# Supplementary material for: A highly efficient and eco-friendly method for the synthesis of 1,3-indandione ring-fused 3-oxindoles bearing two contiguous quaternary stereocenters via an aldol reaction in aqueous media
Source: Royal Society of Chemistry journal article supplement (doi:10.1039/c4ob02103g), 2014-10-27

**A highly efficient and eco-friendly method for synthesis of  
1,3-indandione ring-fused 3-oxindoles bearing two contiguous  
quaternary stereocenters via Aldol reaction in aqueous media**

Xiong-Li Liu,<sup>\*a</sup> Bo-Wen Pan,<sup>a</sup> Wen-Hui Zhang,<sup>a</sup> Chao Yang,<sup>a</sup> Jun Yang,<sup>a</sup> Yang Shi,<sup>a</sup> Ting-Ting  
Feng,<sup>a</sup> Ying Zhou<sup>\*a</sup> and Wei-Cheng Yuan<sup>b</sup>

<sup>a</sup> *Guizhou Engineering Center for Innovative Traditional Chinese Medicine and Ethnic Medicine,  
College of Pharmacy, Guizhou University, Guiyang, 550025, China*

<sup>b</sup> *Key Laboratory for Asymmetric Synthesis & Chirotechnology of Sichuan Province, Chengdu  
Institute of Organic Chemistry, Chinese Academy of Sciences, Chengdu 610041, China*

\* Corresponding author. For Xiong-Li Liu: Tel.: 86-8513853800; fax: 86-8513851091. For Ying  
Zhou: Tel.: 86-8518297907; fax: 86-8518297907.

\* *E-mail address: ls.liuxl@gzu.edu.cn; yingzhou71@yeah.net*

**Supporting Information**

**Table of Contents**

|                                                                                               |     |
|-----------------------------------------------------------------------------------------------|-----|
| 1. X-Ray Crystal Datas for Compounds <b>3a</b> .....                                          | S1  |
| 2. The Copies of <sup>1</sup> H NMR, <sup>13</sup> C NMR Spectra for Compounds <b>3</b> ..... | S13 |

## 1. X-Ray Crystal Datas for Compounds 3a

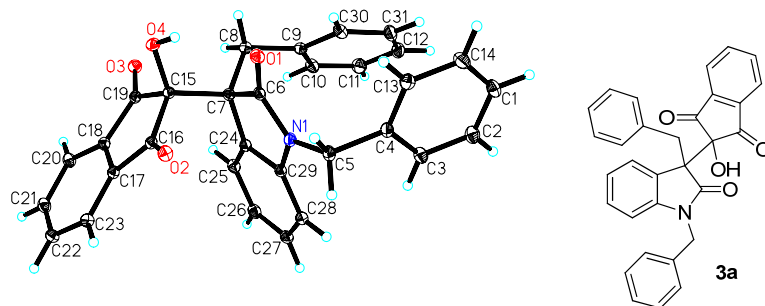

Crystal data for mo\_3a: C<sub>31</sub>H<sub>23</sub>NO<sub>4</sub>,  $M = 473.50$ , orthorhombic,  $a = 10.516(3) \text{ \AA}$ ,  $b = 16.680(4) \text{ \AA}$ ,  $c = 27.091(6) \text{ \AA}$ ,  $\alpha = 90.00^\circ$ ,  $\beta = 90.00^\circ$ ,  $\gamma = 90.00^\circ$ ,  $V = 4752.2(19) \text{ \AA}^3$ ,  $T = 100(2) \text{ K}$ , space group  $Pbca$ ,  $Z = 8$ ,  $\mu(\text{MoK}\alpha) = 0.088 \text{ mm}^{-1}$ , 45752 reflections measured, 6304 independent reflections ( $R_{int} = 0.0862$ ). The final  $R_1$  values were 0.0513 ( $I > 2\sigma(I)$ ). The final  $wR(F^2)$  values were 0.1302 ( $I > 2\sigma(I)$ ). The final  $R_1$  values were 0.0753 (all data). The final  $wR(F^2)$  values were 0.1470 (all data). The goodness of fit on  $F^2$  was 1.048.

**Table 1.** Crystal data and structure refinement for 3a.

|                                 |                                                                                                                     |
|---------------------------------|---------------------------------------------------------------------------------------------------------------------|
| Identification code             | mo_3a_0m                                                                                                            |
| Empirical formula               | C <sub>31</sub> H <sub>23</sub> N O <sub>4</sub>                                                                    |
| Formula weight                  | 473.50                                                                                                              |
| Temperature                     | 100(2) K                                                                                                            |
| Wavelength                      | 0.71073 \AA                                                                                                         |
| Crystal system, space group     | Orthorhombic, P b c a                                                                                               |
| Unit cell dimensions            | a = 10.516(3) \AA    alpha = 90 deg.<br>b = 16.680(4) \AA    beta = 90 deg.<br>c = 27.091(6) \AA    gamma = 90 deg. |
| Volume                          | 4752.2(19) \AA <sup>3</sup>                                                                                         |
| Z, Calculated density           | 8, 1.324 Mg/m <sup>3</sup>                                                                                          |
| Absorption coefficient          | 0.088 mm <sup>-1</sup>                                                                                              |
| F(000)                          | 1984                                                                                                                |
| Crystal size                    | 0.55 x 0.22 x 0.18 mm                                                                                               |
| Theta range for data collection | 2.41 to 29.04 deg.                                                                                                  |
| Limiting indices                | -14<=h<=14, -22<=k<=22, -36<=l<=36                                                                                  |
| Reflections collected / unique  | 45752 / 6304 [R(int) = 0.0862]                                                                                      |
| Completeness to theta = 29.04   | 99.3 %                                                                                                              |
| Absorption correction           | Semi-empirical from equivalents                                                                                     |
| Max. and min. transmission      | 0.9844 and 0.9534                                                                                                   |

|                                   |                                             |
|-----------------------------------|---------------------------------------------|
| Refinement method                 | Full-matrix least-squares on F <sup>2</sup> |
| Data / restraints / parameters    | 6304 / 0 / 326                              |
| Goodness-of-fit on F <sup>2</sup> | 1.048                                       |
| Final R indices [I>2σ(I)]         | R1 = 0.0513, wR2 = 0.1302                   |
| R indices (all data)              | R1 = 0.0753, wR2 = 0.1470                   |
| Largest diff. peak and hole       | 0.368 and -0.305 e.Å <sup>-3</sup>          |

**Table 2.** Atomic coordinates ( x 10<sup>4</sup>) and equivalent isotropic displacement parameters (Å<sup>2</sup> x 10<sup>3</sup>) for **3a**.

U(eq) is defined as one third of the trace of the orthogonalized U<sub>ij</sub> tensor.

|       | x       | y        | z       | U(eq) |
|-------|---------|----------|---------|-------|
| O(1)  | 6656(1) | -937(1)  | 6072(1) | 21(1) |
| O(2)  | 3892(1) | -1359(1) | 5646(1) | 22(1) |
| O(3)  | 3100(1) | -1138(1) | 7368(1) | 22(1) |
| O(4)  | 4855(1) | -1819(1) | 6638(1) | 21(1) |
| N(1)  | 5609(1) | 184(1)   | 5775(1) | 18(1) |
| C(1)  | 9654(2) | 1834(1)  | 5563(1) | 27(1) |
| C(2)  | 8448(2) | 2172(1)  | 5525(1) | 26(1) |
| C(3)  | 7388(2) | 1682(1)  | 5454(1) | 23(1) |
| C(4)  | 7532(2) | 846(1)   | 5423(1) | 20(1) |
| C(5)  | 6392(2) | 305(1)   | 5332(1) | 21(1) |
| C(6)  | 5827(1) | -418(1)  | 6106(1) | 17(1) |
| C(7)  | 4850(1) | -344(1)  | 6532(1) | 16(1) |
| C(8)  | 5575(2) | -212(1)  | 7025(1) | 19(1) |
| C(9)  | 6328(2) | 562(1)   | 7040(1) | 19(1) |
| C(10) | 5826(2) | 1234(1)  | 7280(1) | 24(1) |
| C(11) | 6505(2) | 1948(1)  | 7307(1) | 29(1) |
| C(12) | 7690(2) | 2011(1)  | 7086(1) | 30(1) |
| C(13) | 8744(2) | 516(1)   | 5466(1) | 25(1) |
| C(14) | 9804(2) | 1007(1)  | 5536(1) | 28(1) |
| C(15) | 4069(1) | -1143(1) | 6538(1) | 17(1) |
| C(16) | 3359(1) | -1257(1) | 6041(1) | 18(1) |
| C(17) | 1973(2) | -1277(1) | 6138(1) | 17(1) |
| C(18) | 1753(2) | -1255(1) | 6649(1) | 18(1) |
| C(19) | 2966(2) | -1165(1) | 6921(1) | 18(1) |
| C(20) | 523(2)  | -1338(1) | 6837(1) | 22(1) |
| C(21) | -473(2) | -1420(1) | 6502(1) | 24(1) |
| C(22) | -246(2) | -1430(1) | 5991(1) | 23(1) |
| C(23) | 979(2)  | -1364(1) | 5801(1) | 21(1) |
| C(24) | 4062(1) | 369(1)   | 6366(1) | 18(1) |
| C(25) | 3041(2) | 759(1)   | 6588(1) | 22(1) |

|       |         |         |         |       |
|-------|---------|---------|---------|-------|
| C(26) | 2497(2) | 1420(1) | 6345(1) | 25(1) |
| C(27) | 2977(2) | 1678(1) | 5893(1) | 26(1) |
| C(28) | 4019(2) | 1304(1) | 5672(1) | 23(1) |
| C(29) | 4553(1) | 655(1)  | 5918(1) | 18(1) |
| C(30) | 7529(2) | 628(1)  | 6820(1) | 24(1) |
| C(31) | 8197(2) | 1352(1) | 6838(1) | 29(1) |

**Table 3.** Bond lengths [Å] and angles [deg] for **3a**.

|             |            |
|-------------|------------|
| O(1)-C(6)   | 1.2317(19) |
| O(2)-C(16)  | 1.2212(19) |
| O(3)-C(19)  | 1.2217(19) |
| O(4)-C(15)  | 1.4243(18) |
| O(4)-H(4)   | 0.8400     |
| N(1)-C(6)   | 1.366(2)   |
| N(1)-C(29)  | 1.415(2)   |
| N(1)-C(5)   | 1.470(2)   |
| C(1)-C(14)  | 1.390(3)   |
| C(1)-C(2)   | 1.392(3)   |
| C(1)-H(1)   | 0.9500     |
| C(2)-C(3)   | 1.396(2)   |
| C(2)-H(2)   | 0.9500     |
| C(3)-C(4)   | 1.405(2)   |
| C(3)-H(3)   | 0.9500     |
| C(4)-C(13)  | 1.393(2)   |
| C(4)-C(5)   | 1.520(2)   |
| C(5)-H(5A)  | 0.9900     |
| C(5)-H(5B)  | 0.9900     |
| C(6)-C(7)   | 1.549(2)   |
| C(7)-C(24)  | 1.517(2)   |
| C(7)-C(8)   | 1.555(2)   |
| C(7)-C(15)  | 1.565(2)   |
| C(8)-C(9)   | 1.515(2)   |
| C(8)-H(8A)  | 0.9900     |
| C(8)-H(8B)  | 0.9900     |
| C(9)-C(10)  | 1.398(2)   |
| C(9)-C(30)  | 1.400(2)   |
| C(10)-C(11) | 1.391(2)   |
| C(10)-H(10) | 0.9500     |
| C(11)-C(12) | 1.386(3)   |
| C(11)-H(11) | 0.9500     |
| C(12)-C(31) | 1.394(3)   |
| C(12)-H(12) | 0.9500     |

|                 |            |
|-----------------|------------|
| C(13)-C(14)     | 1.396(2)   |
| C(13)-H(13)     | 0.9500     |
| C(14)-H(14)     | 0.9500     |
| C(15)-C(16)     | 1.552(2)   |
| C(15)-C(19)     | 1.555(2)   |
| C(16)-C(17)     | 1.482(2)   |
| C(17)-C(23)     | 1.396(2)   |
| C(17)-C(18)     | 1.402(2)   |
| C(18)-C(20)     | 1.398(2)   |
| C(18)-C(19)     | 1.481(2)   |
| C(20)-C(21)     | 1.393(2)   |
| C(20)-H(20)     | 0.9500     |
| C(21)-C(22)     | 1.405(2)   |
| C(21)-H(21)     | 0.9500     |
| C(22)-C(23)     | 1.391(2)   |
| C(22)-H(22)     | 0.9500     |
| C(23)-H(23)     | 0.9500     |
| C(24)-C(25)     | 1.392(2)   |
| C(24)-C(29)     | 1.404(2)   |
| C(25)-C(26)     | 1.405(2)   |
| C(25)-H(25)     | 0.9500     |
| C(26)-C(27)     | 1.394(3)   |
| C(26)-H(26)     | 0.9500     |
| C(27)-C(28)     | 1.395(2)   |
| C(27)-H(27)     | 0.9500     |
| C(28)-C(29)     | 1.390(2)   |
| C(28)-H(28)     | 0.9500     |
| C(30)-C(31)     | 1.399(2)   |
| C(30)-H(30)     | 0.9500     |
| C(31)-H(31)     | 0.9500     |
| C(15)-O(4)-H(4) | 109.5      |
| C(6)-N(1)-C(29) | 111.10(13) |
| C(6)-N(1)-C(5)  | 122.95(13) |
| C(29)-N(1)-C(5) | 125.95(13) |
| C(14)-C(1)-C(2) | 120.10(16) |
| C(14)-C(1)-H(1) | 119.9      |
| C(2)-C(1)-H(1)  | 119.9      |
| C(1)-C(2)-C(3)  | 120.02(16) |
| C(1)-C(2)-H(2)  | 120.0      |
| C(3)-C(2)-H(2)  | 120.0      |
| C(2)-C(3)-C(4)  | 120.27(16) |
| C(2)-C(3)-H(3)  | 119.9      |
| C(4)-C(3)-H(3)  | 119.9      |
| C(13)-C(4)-C(3) | 118.99(15) |

|                   |            |
|-------------------|------------|
| C(13)-C(4)-C(5)   | 120.07(15) |
| C(3)-C(4)-C(5)    | 120.93(15) |
| N(1)-C(5)-C(4)    | 112.98(13) |
| N(1)-C(5)-H(5A)   | 109.0      |
| C(4)-C(5)-H(5A)   | 109.0      |
| N(1)-C(5)-H(5B)   | 109.0      |
| C(4)-C(5)-H(5B)   | 109.0      |
| H(5A)-C(5)-H(5B)  | 107.8      |
| O(1)-C(6)-N(1)    | 125.88(15) |
| O(1)-C(6)-C(7)    | 125.49(14) |
| N(1)-C(6)-C(7)    | 108.62(13) |
| C(24)-C(7)-C(6)   | 101.82(12) |
| C(24)-C(7)-C(8)   | 114.16(13) |
| C(6)-C(7)-C(8)    | 109.02(12) |
| C(24)-C(7)-C(15)  | 112.64(12) |
| C(6)-C(7)-C(15)   | 106.81(12) |
| C(8)-C(7)-C(15)   | 111.61(12) |
| C(9)-C(8)-C(7)    | 113.63(13) |
| C(9)-C(8)-H(8A)   | 108.8      |
| C(7)-C(8)-H(8A)   | 108.8      |
| C(9)-C(8)-H(8B)   | 108.8      |
| C(7)-C(8)-H(8B)   | 108.8      |
| H(8A)-C(8)-H(8B)  | 107.7      |
| C(10)-C(9)-C(30)  | 118.40(15) |
| C(10)-C(9)-C(8)   | 119.80(14) |
| C(30)-C(9)-C(8)   | 121.81(15) |
| C(11)-C(10)-C(9)  | 121.10(16) |
| C(11)-C(10)-H(10) | 119.5      |
| C(9)-C(10)-H(10)  | 119.5      |
| C(12)-C(11)-C(10) | 120.21(17) |
| C(12)-C(11)-H(11) | 119.9      |
| C(10)-C(11)-H(11) | 119.9      |
| C(11)-C(12)-C(31) | 119.53(16) |
| C(11)-C(12)-H(12) | 120.2      |
| C(31)-C(12)-H(12) | 120.2      |
| C(4)-C(13)-C(14)  | 120.75(16) |
| C(4)-C(13)-H(13)  | 119.6      |
| C(14)-C(13)-H(13) | 119.6      |
| C(1)-C(14)-C(13)  | 119.85(16) |
| C(1)-C(14)-H(14)  | 120.1      |
| C(13)-C(14)-H(14) | 120.1      |
| O(4)-C(15)-C(16)  | 110.25(12) |
| O(4)-C(15)-C(19)  | 106.79(12) |
| C(16)-C(15)-C(19) | 102.50(12) |

|                   |            |
|-------------------|------------|
| O(4)-C(15)-C(7)   | 111.83(12) |
| C(16)-C(15)-C(7)  | 110.25(12) |
| C(19)-C(15)-C(7)  | 114.78(12) |
| O(2)-C(16)-C(17)  | 127.17(14) |
| O(2)-C(16)-C(15)  | 123.94(14) |
| C(17)-C(16)-C(15) | 108.76(13) |
| C(23)-C(17)-C(18) | 121.66(15) |
| C(23)-C(17)-C(16) | 128.50(14) |
| C(18)-C(17)-C(16) | 109.68(13) |
| C(20)-C(18)-C(17) | 120.70(15) |
| C(20)-C(18)-C(19) | 128.72(15) |
| C(17)-C(18)-C(19) | 110.55(14) |
| O(3)-C(19)-C(18)  | 126.64(15) |
| O(3)-C(19)-C(15)  | 125.03(14) |
| C(18)-C(19)-C(15) | 108.29(13) |
| C(21)-C(20)-C(18) | 117.85(16) |
| C(21)-C(20)-H(20) | 121.1      |
| C(18)-C(20)-H(20) | 121.1      |
| C(20)-C(21)-C(22) | 121.04(15) |
| C(20)-C(21)-H(21) | 119.5      |
| C(22)-C(21)-H(21) | 119.5      |
| C(23)-C(22)-C(21) | 121.42(15) |
| C(23)-C(22)-H(22) | 119.3      |
| C(21)-C(22)-H(22) | 119.3      |
| C(22)-C(23)-C(17) | 117.31(15) |
| C(22)-C(23)-H(23) | 121.3      |
| C(17)-C(23)-H(23) | 121.3      |
| C(25)-C(24)-C(29) | 119.85(15) |
| C(25)-C(24)-C(7)  | 131.36(15) |
| C(29)-C(24)-C(7)  | 108.75(13) |
| C(24)-C(25)-C(26) | 118.65(16) |
| C(24)-C(25)-H(25) | 120.7      |
| C(26)-C(25)-H(25) | 120.7      |
| C(27)-C(26)-C(25) | 120.37(16) |
| C(27)-C(26)-H(26) | 119.8      |
| C(25)-C(26)-H(26) | 119.8      |
| C(26)-C(27)-C(28) | 121.68(16) |
| C(26)-C(27)-H(27) | 119.2      |
| C(28)-C(27)-H(27) | 119.2      |
| C(29)-C(28)-C(27) | 117.26(16) |
| C(29)-C(28)-H(28) | 121.4      |
| C(27)-C(28)-H(28) | 121.4      |
| C(28)-C(29)-C(24) | 122.13(15) |
| C(28)-C(29)-N(1)  | 128.20(15) |

|                   |            |
|-------------------|------------|
| C(24)-C(29)-N(1)  | 109.67(13) |
| C(31)-C(30)-C(9)  | 120.40(16) |
| C(31)-C(30)-H(30) | 119.8      |
| C(9)-C(30)-H(30)  | 119.8      |
| C(12)-C(31)-C(30) | 120.33(17) |
| C(12)-C(31)-H(31) | 119.8      |
| C(30)-C(31)-H(31) | 119.8      |

---

Symmetry transformations used to generate equivalent atoms:

**Table 4.** Anisotropic displacement parameters ( $\text{Å}^2 \times 10^3$ ) for **3a**.

The anisotropic displacement factor exponent takes the form:

$$-2 \pi^2 [ h^2 a^{*2} U11 + \dots + 2 h k a^* b^* U12 ]$$

---

|       | U11   | U22   | U33   | U23   | U13   | U12    |
|-------|-------|-------|-------|-------|-------|--------|
| O(1)  | 17(1) | 20(1) | 26(1) | -1(1) | 0(1)  | 2(1)   |
| O(2)  | 21(1) | 24(1) | 20(1) | -2(1) | 2(1)  | -1(1)  |
| O(3)  | 23(1) | 26(1) | 18(1) | 1(1)  | 0(1)  | -2(1)  |
| O(4)  | 18(1) | 18(1) | 27(1) | 4(1)  | 1(1)  | 3(1)   |
| N(1)  | 17(1) | 18(1) | 21(1) | 1(1)  | 1(1)  | -2(1)  |
| C(1)  | 21(1) | 30(1) | 29(1) | -4(1) | -2(1) | -7(1)  |
| C(2)  | 28(1) | 20(1) | 31(1) | -4(1) | 0(1)  | -4(1)  |
| C(3)  | 19(1) | 22(1) | 28(1) | -4(1) | 2(1)  | -1(1)  |
| C(4)  | 20(1) | 21(1) | 18(1) | 0(1)  | 1(1)  | -4(1)  |
| C(5)  | 20(1) | 23(1) | 19(1) | 0(1)  | 2(1)  | -6(1)  |
| C(6)  | 15(1) | 17(1) | 20(1) | -1(1) | -2(1) | -2(1)  |
| C(7)  | 15(1) | 16(1) | 19(1) | 0(1)  | 0(1)  | 0(1)   |
| C(8)  | 19(1) | 20(1) | 19(1) | 1(1)  | -2(1) | -1(1)  |
| C(9)  | 19(1) | 21(1) | 17(1) | 1(1)  | -3(1) | -1(1)  |
| C(10) | 20(1) | 24(1) | 28(1) | -4(1) | 0(1)  | -2(1)  |
| C(11) | 32(1) | 22(1) | 35(1) | -5(1) | -5(1) | -1(1)  |
| C(12) | 33(1) | 27(1) | 30(1) | 4(1)  | -8(1) | -11(1) |
| C(13) | 25(1) | 22(1) | 27(1) | 1(1)  | -2(1) | -1(1)  |
| C(14) | 20(1) | 30(1) | 35(1) | -1(1) | -3(1) | 0(1)   |
| C(15) | 15(1) | 15(1) | 20(1) | 1(1)  | 0(1)  | 1(1)   |
| C(16) | 17(1) | 14(1) | 22(1) | 2(1)  | -1(1) | 0(1)   |
| C(17) | 18(1) | 15(1) | 19(1) | 0(1)  | 0(1)  | -1(1)  |
| C(18) | 18(1) | 16(1) | 21(1) | 0(1)  | 1(1)  | -1(1)  |
| C(19) | 18(1) | 15(1) | 20(1) | 1(1)  | 0(1)  | -1(1)  |
| C(20) | 18(1) | 24(1) | 24(1) | -2(1) | 3(1)  | -1(1)  |
| C(21) | 17(1) | 25(1) | 29(1) | -1(1) | 2(1)  | -2(1)  |
| C(22) | 19(1) | 22(1) | 28(1) | 1(1)  | -5(1) | -1(1)  |
| C(23) | 21(1) | 21(1) | 22(1) | 1(1)  | -2(1) | 0(1)   |



|       |       |       |       |       |       |        |
|-------|-------|-------|-------|-------|-------|--------|
| C(24) | 16(1) | 16(1) | 22(1) | 0(1)  | -2(1) | -1(1)  |
| C(25) | 19(1) | 20(1) | 27(1) | -3(1) | 0(1)  | -1(1)  |
| C(26) | 18(1) | 20(1) | 38(1) | -4(1) | -2(1) | 2(1)   |
| C(27) | 21(1) | 18(1) | 40(1) | 4(1)  | -9(1) | 0(1)   |
| C(28) | 20(1) | 20(1) | 28(1) | 4(1)  | -4(1) | -3(1)  |
| C(29) | 17(1) | 16(1) | 22(1) | -1(1) | -2(1) | -2(1)  |
| C(30) | 19(1) | 28(1) | 23(1) | -4(1) | -2(1) | -2(1)  |
| C(31) | 23(1) | 38(1) | 25(1) | 2(1)  | -2(1) | -11(1) |

**Table 5.** Hydrogen coordinates ( $\times 10^4$ ) and isotropic displacement parameters ( $\text{\AA}^2 \times 10^3$ ) for **3a**.

|       | x     | y     | z    | U(eq) |
|-------|-------|-------|------|-------|
| H(4)  | 5521  | -1790 | 6467 | 31    |
| H(1)  | 10376 | 2169  | 5608 | 32    |
| H(2)  | 8347  | 2737  | 5547 | 32    |
| H(3)  | 6567  | 1914  | 5427 | 28    |
| H(5A) | 5859  | 544   | 5069 | 25    |
| H(5B) | 6696  | -222  | 5212 | 25    |
| H(8A) | 4954  | -210  | 7299 | 23    |
| H(8B) | 6163  | -667  | 7078 | 23    |
| H(10) | 5008  | 1201  | 7427 | 29    |
| H(11) | 6156  | 2394  | 7477 | 35    |
| H(12) | 8153  | 2499  | 7104 | 36    |
| H(13) | 8850  | -48   | 5447 | 30    |
| H(14) | 10627 | 776   | 5565 | 34    |
| H(20) | 371   | -1340 | 7183 | 26    |
| H(21) | -1320 | -1470 | 6621 | 29    |
| H(22) | -943  | -1483 | 5771 | 28    |
| H(23) | 1132  | -1377 | 5455 | 26    |
| H(25) | 2719  | 583   | 6897 | 26    |
| H(26) | 1798  | 1693  | 6491 | 30    |
| H(27) | 2585  | 2118  | 5731 | 32    |
| H(28) | 4350  | 1487  | 5365 | 27    |
| H(30) | 7892  | 178   | 6658 | 28    |
| H(31) | 9001  | 1396  | 6680 | 34    |

**Table 6.** Torsion angles [deg] for **3a**.

---

|                         |             |
|-------------------------|-------------|
| C(14)-C(1)-C(2)-C(3)    | -0.7(3)     |
| C(1)-C(2)-C(3)-C(4)     | 0.2(3)      |
| C(2)-C(3)-C(4)-C(13)    | 0.3(2)      |
| C(2)-C(3)-C(4)-C(5)     | -178.27(15) |
| C(6)-N(1)-C(5)-C(4)     | -88.88(18)  |
| C(29)-N(1)-C(5)-C(4)    | 91.20(18)   |
| C(13)-C(4)-C(5)-N(1)    | 104.18(17)  |
| C(3)-C(4)-C(5)-N(1)     | -77.31(19)  |
| C(29)-N(1)-C(6)-O(1)    | 177.76(14)  |
| C(5)-N(1)-C(6)-O(1)     | -2.2(2)     |
| C(29)-N(1)-C(6)-C(7)    | -1.91(17)   |
| C(5)-N(1)-C(6)-C(7)     | 178.16(13)  |
| O(1)-C(6)-C(7)-C(24)    | -177.97(14) |
| N(1)-C(6)-C(7)-C(24)    | 1.71(15)    |
| O(1)-C(6)-C(7)-C(8)     | 61.06(19)   |
| N(1)-C(6)-C(7)-C(8)     | -119.26(13) |
| O(1)-C(6)-C(7)-C(15)    | -59.67(19)  |
| N(1)-C(6)-C(7)-C(15)    | 120.00(13)  |
| C(24)-C(7)-C(8)-C(9)    | -49.85(18)  |
| C(6)-C(7)-C(8)-C(9)     | 63.24(16)   |
| C(15)-C(7)-C(8)-C(9)    | -179.01(12) |
| C(7)-C(8)-C(9)-C(10)    | 99.41(18)   |
| C(7)-C(8)-C(9)-C(30)    | -80.89(19)  |
| C(30)-C(9)-C(10)-C(11)  | -0.8(2)     |
| C(8)-C(9)-C(10)-C(11)   | 178.89(15)  |
| C(9)-C(10)-C(11)-C(12)  | 1.2(3)      |
| C(10)-C(11)-C(12)-C(31) | -0.1(3)     |
| C(3)-C(4)-C(13)-C(14)   | -0.3(3)     |
| C(5)-C(4)-C(13)-C(14)   | 178.21(15)  |
| C(2)-C(1)-C(14)-C(13)   | 0.6(3)      |
| C(4)-C(13)-C(14)-C(1)   | -0.1(3)     |
| C(24)-C(7)-C(15)-O(4)   | 173.12(12)  |
| C(6)-C(7)-C(15)-O(4)    | 62.15(15)   |
| C(8)-C(7)-C(15)-O(4)    | -56.92(16)  |
| C(24)-C(7)-C(15)-C(16)  | 50.08(16)   |
| C(6)-C(7)-C(15)-C(16)   | -60.89(15)  |
| C(8)-C(7)-C(15)-C(16)   | -179.96(12) |
| C(24)-C(7)-C(15)-C(19)  | -65.03(17)  |
| C(6)-C(7)-C(15)-C(19)   | -176.00(12) |
| C(8)-C(7)-C(15)-C(19)   | 64.93(16)   |
| O(4)-C(15)-C(16)-O(2)   | -58.67(19)  |

|                         |             |
|-------------------------|-------------|
| C(19)-C(15)-C(16)-O(2)  | -172.07(14) |
| C(7)-C(15)-C(16)-O(2)   | 65.29(18)   |
| O(4)-C(15)-C(16)-C(17)  | 117.40(13)  |
| C(19)-C(15)-C(16)-C(17) | 4.00(15)    |
| C(7)-C(15)-C(16)-C(17)  | -118.63(13) |
| O(2)-C(16)-C(17)-C(23)  | -4.5(3)     |
| C(15)-C(16)-C(17)-C(23) | 179.61(15)  |
| O(2)-C(16)-C(17)-C(18)  | 170.95(15)  |
| C(15)-C(16)-C(17)-C(18) | -4.97(17)   |
| C(23)-C(17)-C(18)-C(20) | 1.5(2)      |
| C(16)-C(17)-C(18)-C(20) | -174.33(14) |
| C(23)-C(17)-C(18)-C(19) | 179.58(14)  |
| C(16)-C(17)-C(18)-C(19) | 3.78(17)    |
| C(20)-C(18)-C(19)-O(3)  | -0.9(3)     |
| C(17)-C(18)-C(19)-O(3)  | -178.86(15) |
| C(20)-C(18)-C(19)-C(15) | 176.81(16)  |
| C(17)-C(18)-C(19)-C(15) | -1.11(17)   |
| O(4)-C(15)-C(19)-O(3)   | 60.05(19)   |
| C(16)-C(15)-C(19)-O(3)  | 175.98(15)  |
| C(7)-C(15)-C(19)-O(3)   | -64.50(19)  |
| O(4)-C(15)-C(19)-C(18)  | -117.74(13) |
| C(16)-C(15)-C(19)-C(18) | -1.82(15)   |
| C(7)-C(15)-C(19)-C(18)  | 117.70(14)  |
| C(17)-C(18)-C(20)-C(21) | -1.8(2)     |
| C(19)-C(18)-C(20)-C(21) | -179.56(15) |
| C(18)-C(20)-C(21)-C(22) | 0.9(2)      |
| C(20)-C(21)-C(22)-C(23) | 0.4(3)      |
| C(21)-C(22)-C(23)-C(17) | -0.8(2)     |
| C(18)-C(17)-C(23)-C(22) | -0.1(2)     |
| C(16)-C(17)-C(23)-C(22) | 174.81(15)  |
| C(6)-C(7)-C(24)-C(25)   | -178.52(16) |
| C(8)-C(7)-C(24)-C(25)   | -61.2(2)    |
| C(15)-C(7)-C(24)-C(25)  | 67.4(2)     |
| C(6)-C(7)-C(24)-C(29)   | -0.93(15)   |
| C(8)-C(7)-C(24)-C(29)   | 116.39(15)  |
| C(15)-C(7)-C(24)-C(29)  | -114.97(14) |
| C(29)-C(24)-C(25)-C(26) | 2.2(2)      |
| C(7)-C(24)-C(25)-C(26)  | 179.53(16)  |
| C(24)-C(25)-C(26)-C(27) | -0.2(2)     |
| C(25)-C(26)-C(27)-C(28) | -1.3(3)     |
| C(26)-C(27)-C(28)-C(29) | 0.9(2)      |
| C(27)-C(28)-C(29)-C(24) | 1.2(2)      |
| C(27)-C(28)-C(29)-N(1)  | -179.43(15) |
| C(25)-C(24)-C(29)-C(28) | -2.7(2)     |

|                         |             |
|-------------------------|-------------|
| C(7)-C(24)-C(29)-C(28)  | 179.39(14)  |
| C(25)-C(24)-C(29)-N(1)  | 177.79(14)  |
| C(7)-C(24)-C(29)-N(1)   | -0.12(17)   |
| C(6)-N(1)-C(29)-C(28)   | -178.16(15) |
| C(5)-N(1)-C(29)-C(28)   | 1.8(3)      |
| C(6)-N(1)-C(29)-C(24)   | 1.32(17)    |
| C(5)-N(1)-C(29)-C(24)   | -178.76(14) |
| C(10)-C(9)-C(30)-C(31)  | -0.6(2)     |
| C(8)-C(9)-C(30)-C(31)   | 179.65(15)  |
| C(11)-C(12)-C(31)-C(30) | -1.3(3)     |
| C(9)-C(30)-C(31)-C(12)  | 1.7(3)      |

---

Symmetry transformations used to generate equivalent atoms:

**Table 7.** Hydrogen bonds for **3a** [Å and deg.].

| D-H...A          | d(D-H) | d(H...A) | d(D...A)   | <(DHA) |
|------------------|--------|----------|------------|--------|
| O(4)-H(4)...O(1) | 0.84   | 2.14     | 2.8460(16) | 141.0  |

---

Symmetry transformations used to generate equivalent atoms:



# <sup>1</sup>H and <sup>13</sup>C NMR of 3b

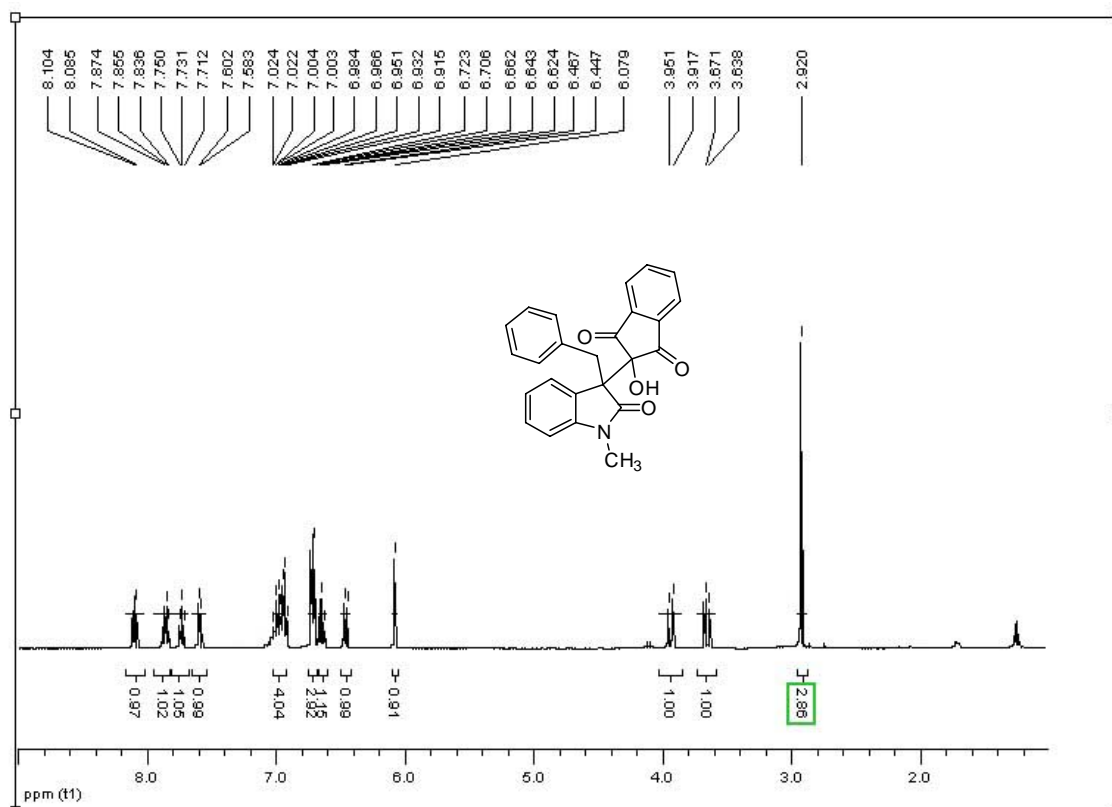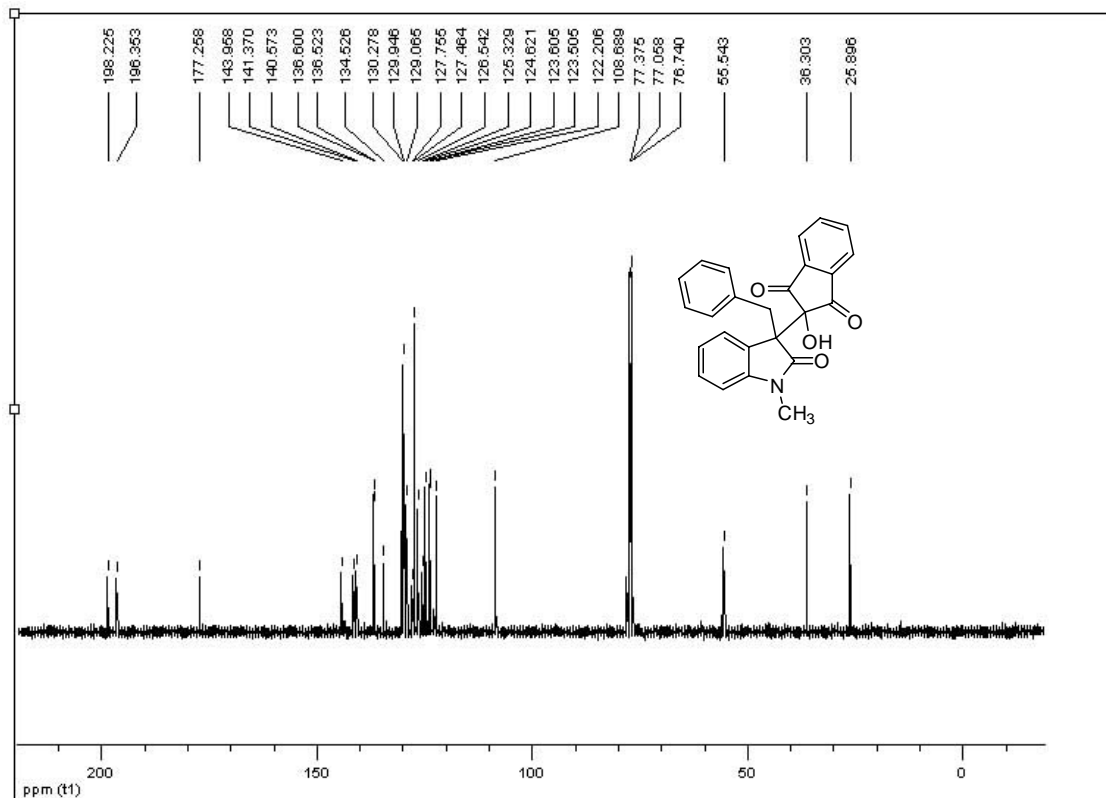







# <sup>1</sup>H and <sup>13</sup>C NMR of 3e

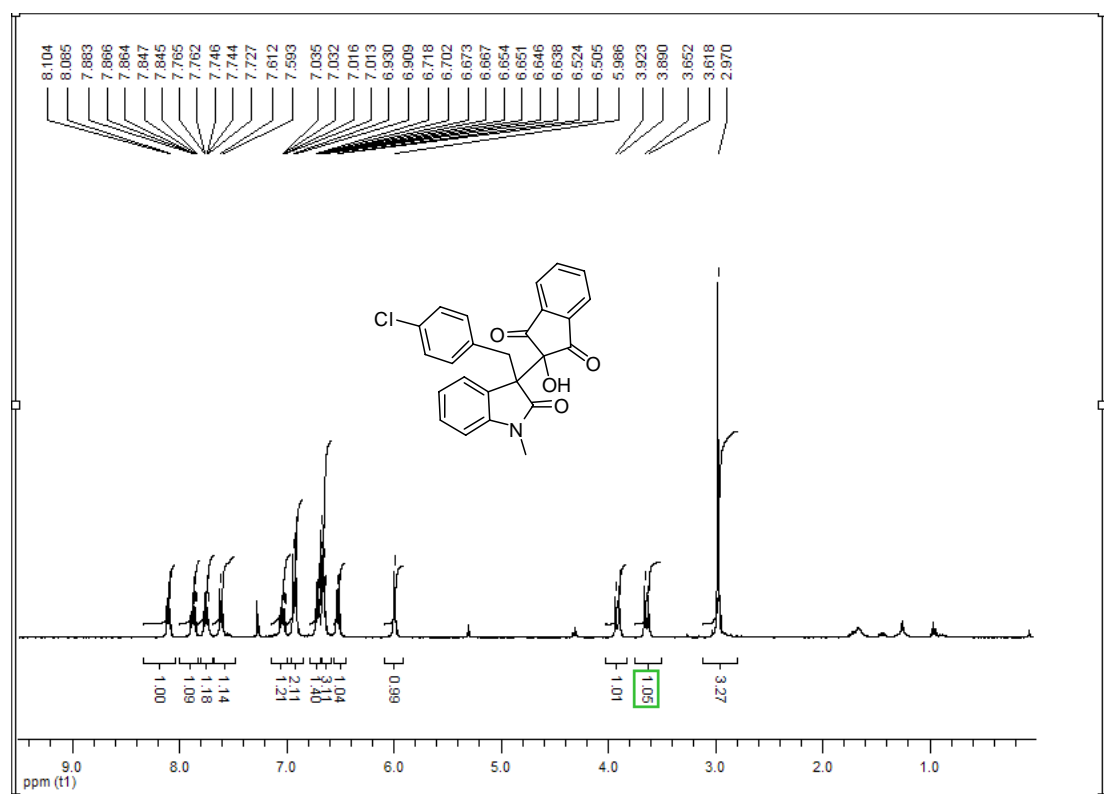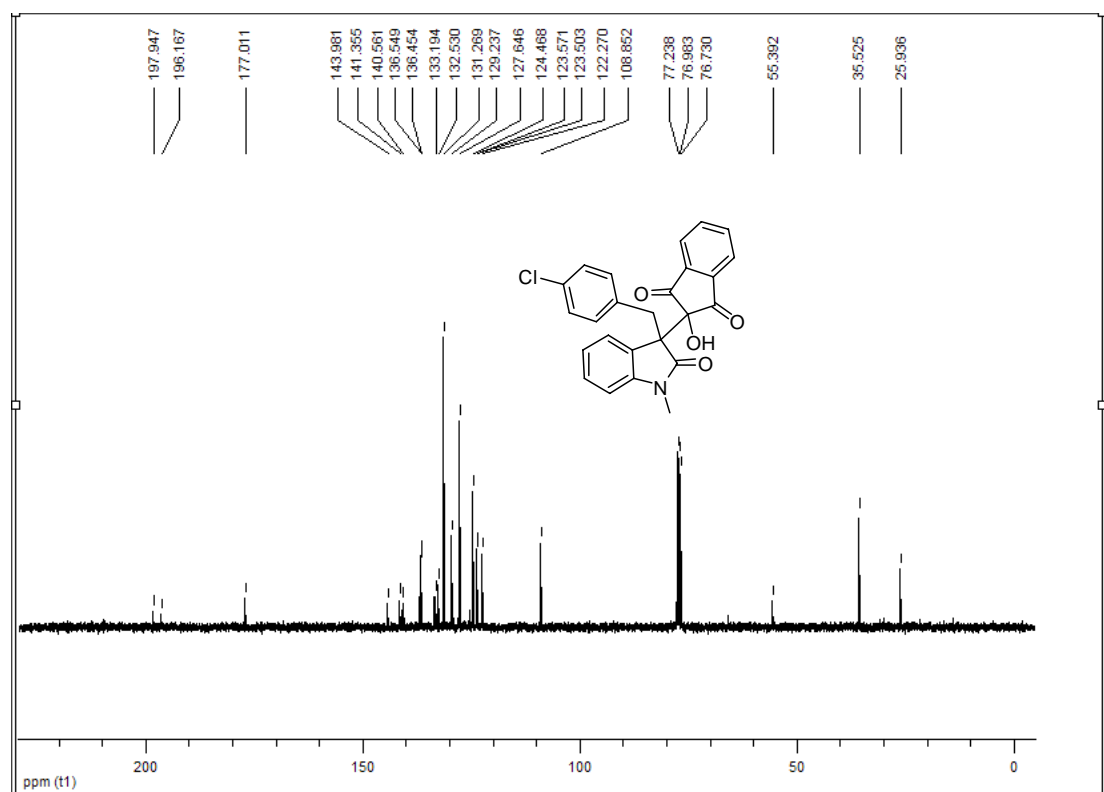

# $^1\text{H}$ and $^{13}\text{C}$ NMR of 3f

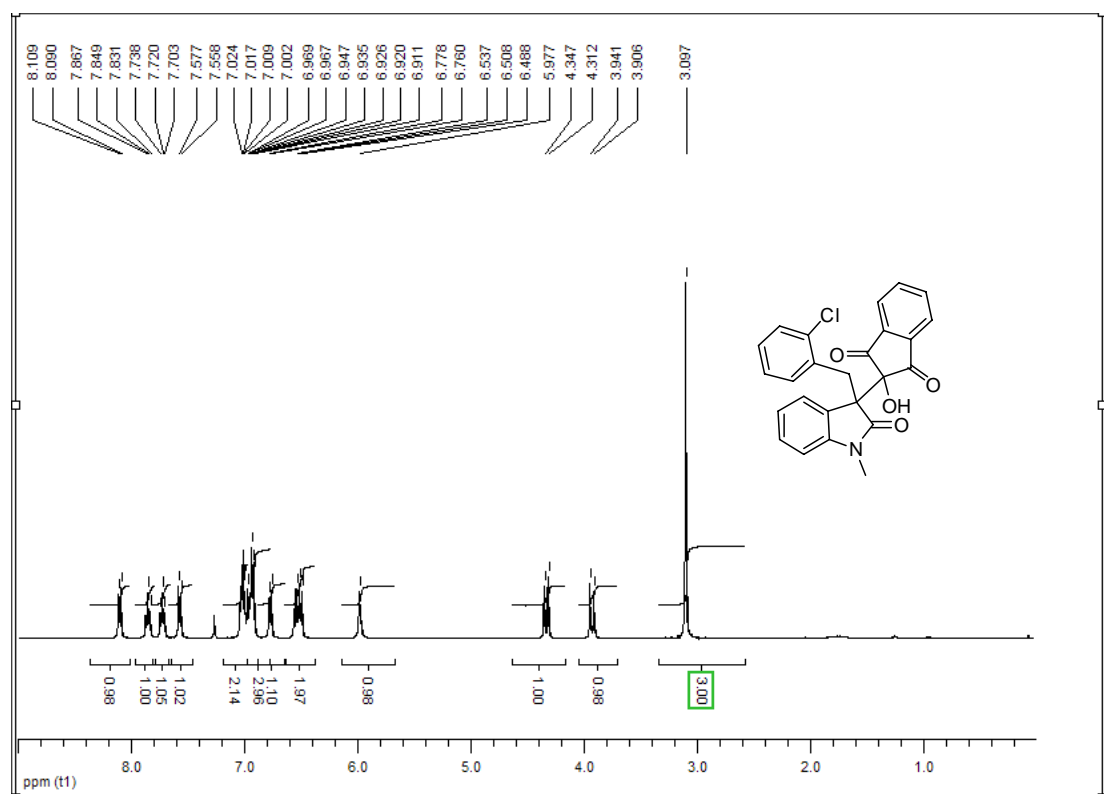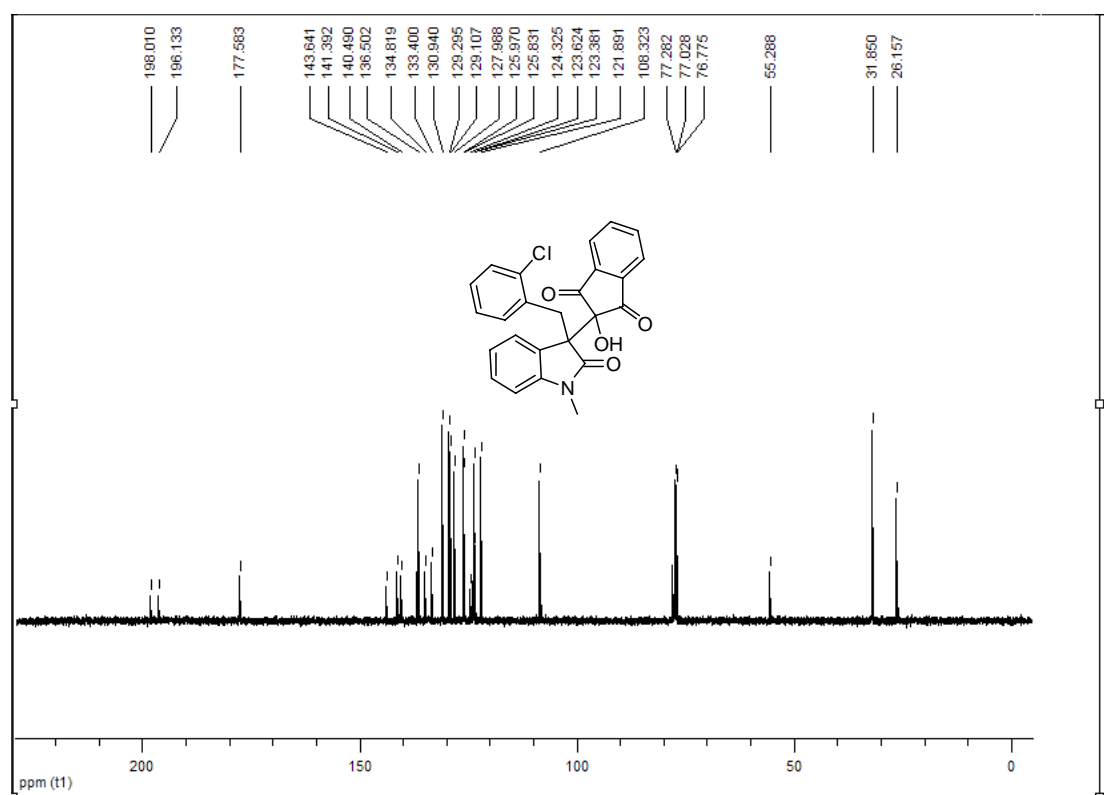

# <sup>1</sup>H and <sup>13</sup>C NMR of 3g

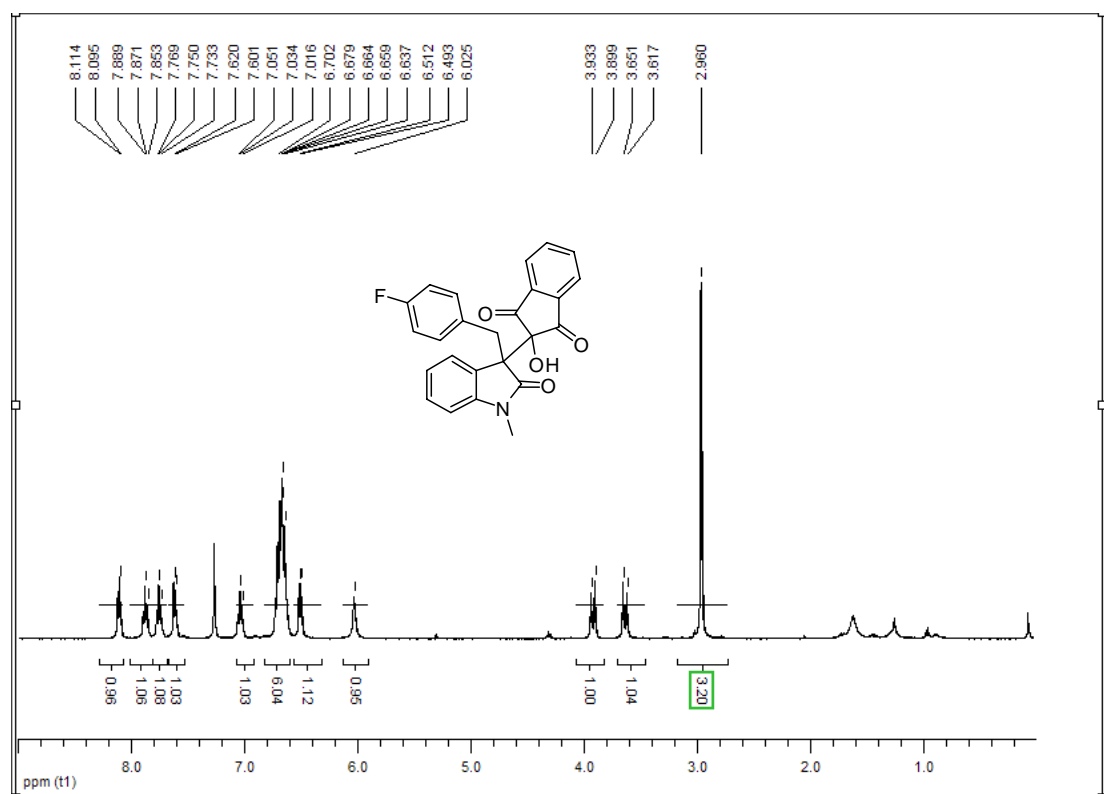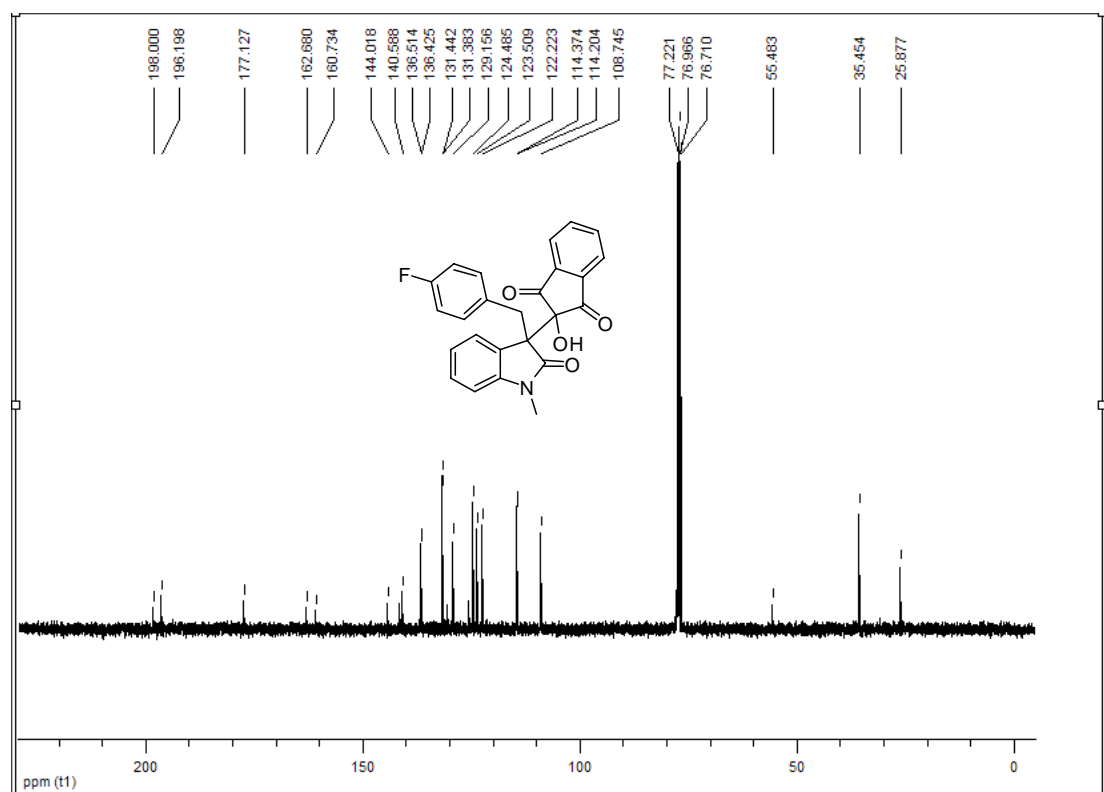

# <sup>1</sup>H and <sup>13</sup>C NMR of 3h

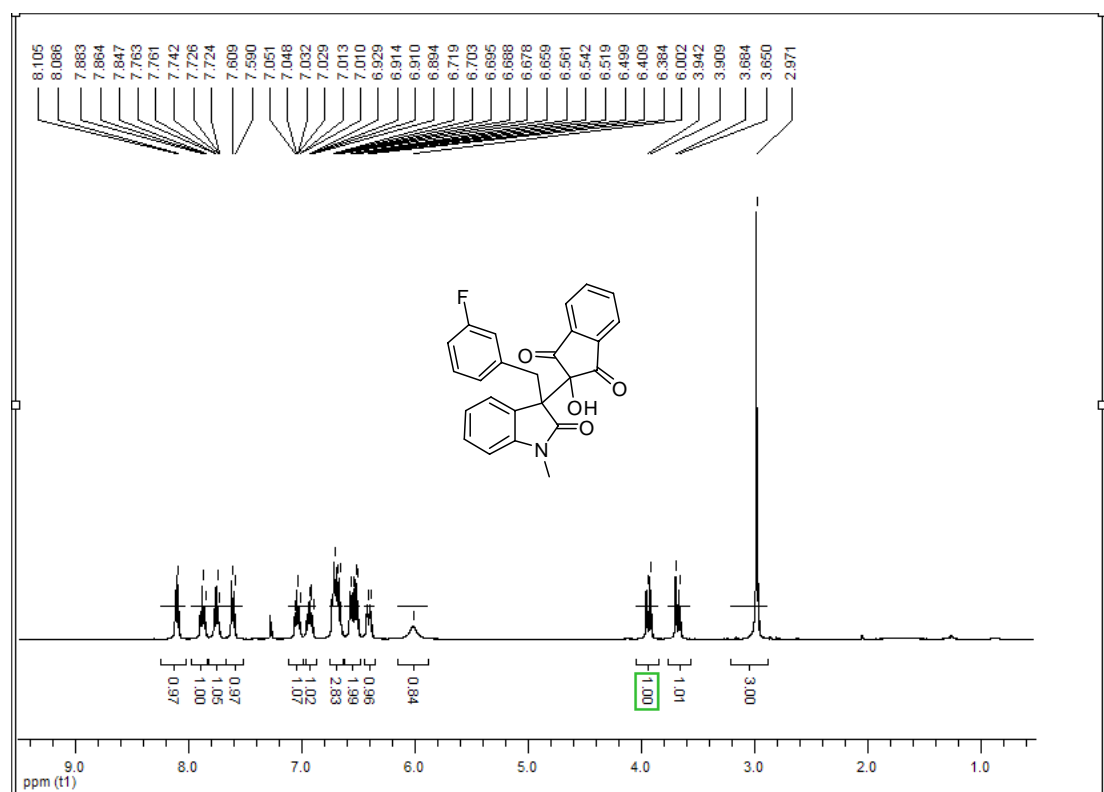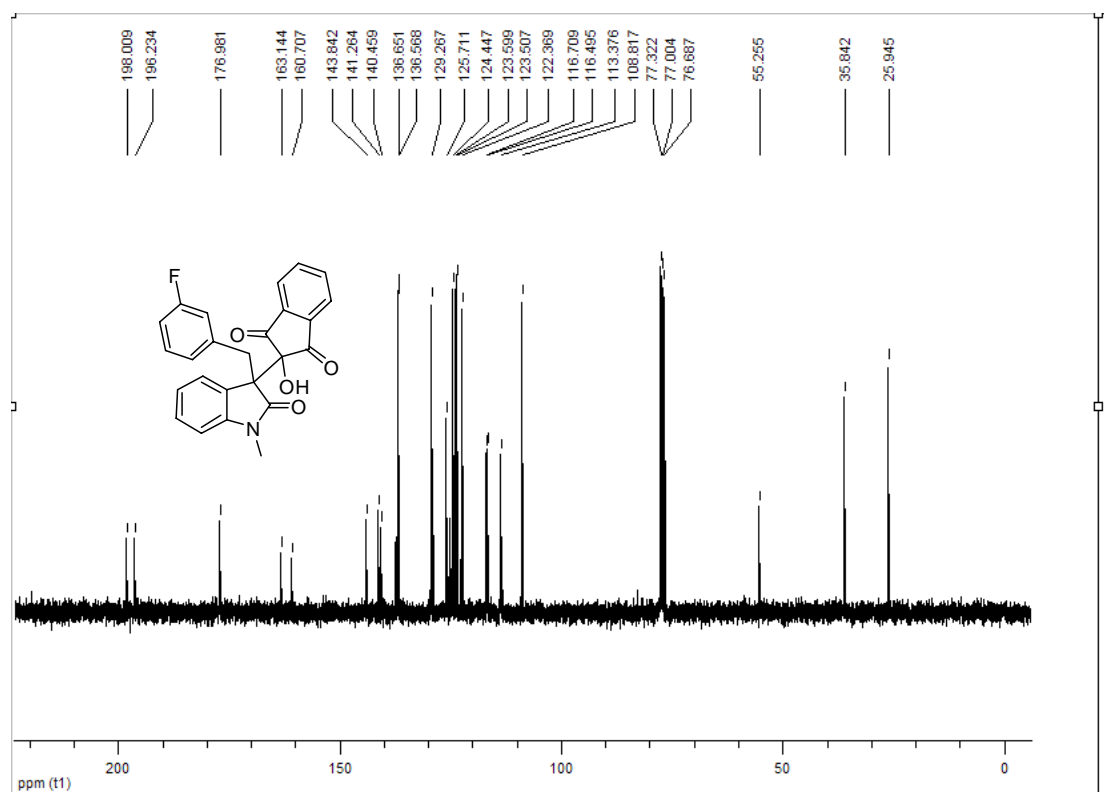



# $^1\text{H}$ and $^{13}\text{C}$ NMR of 3j

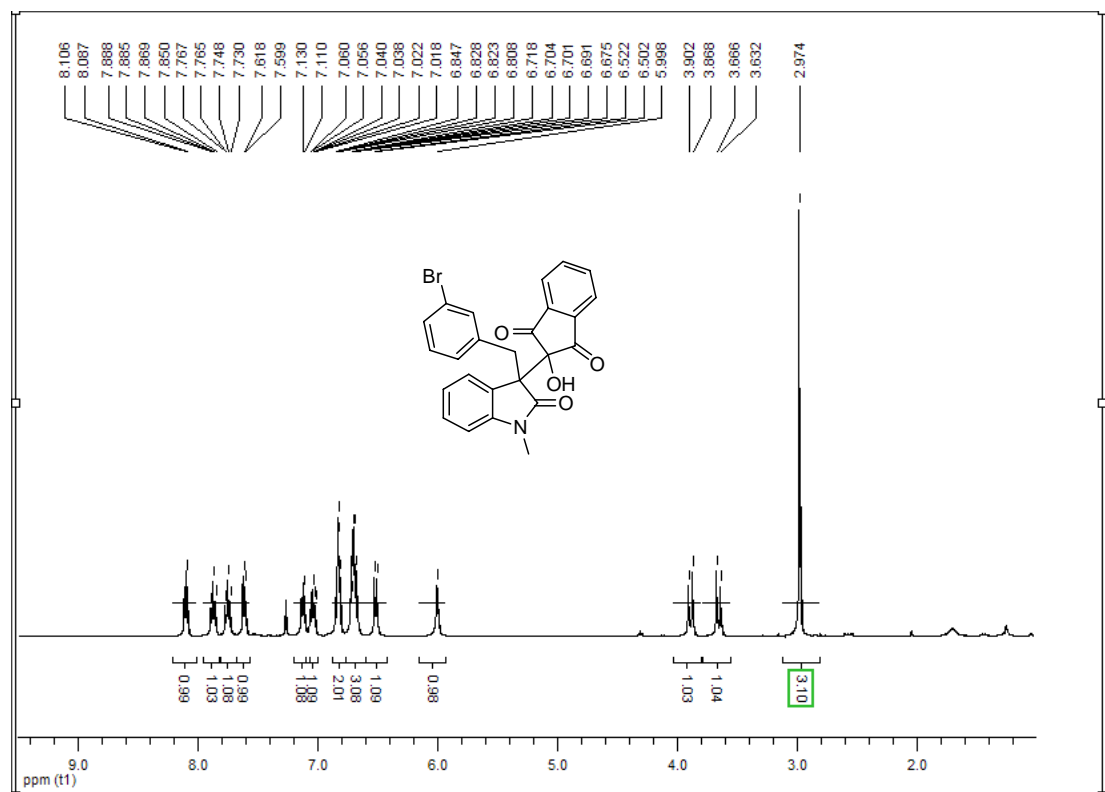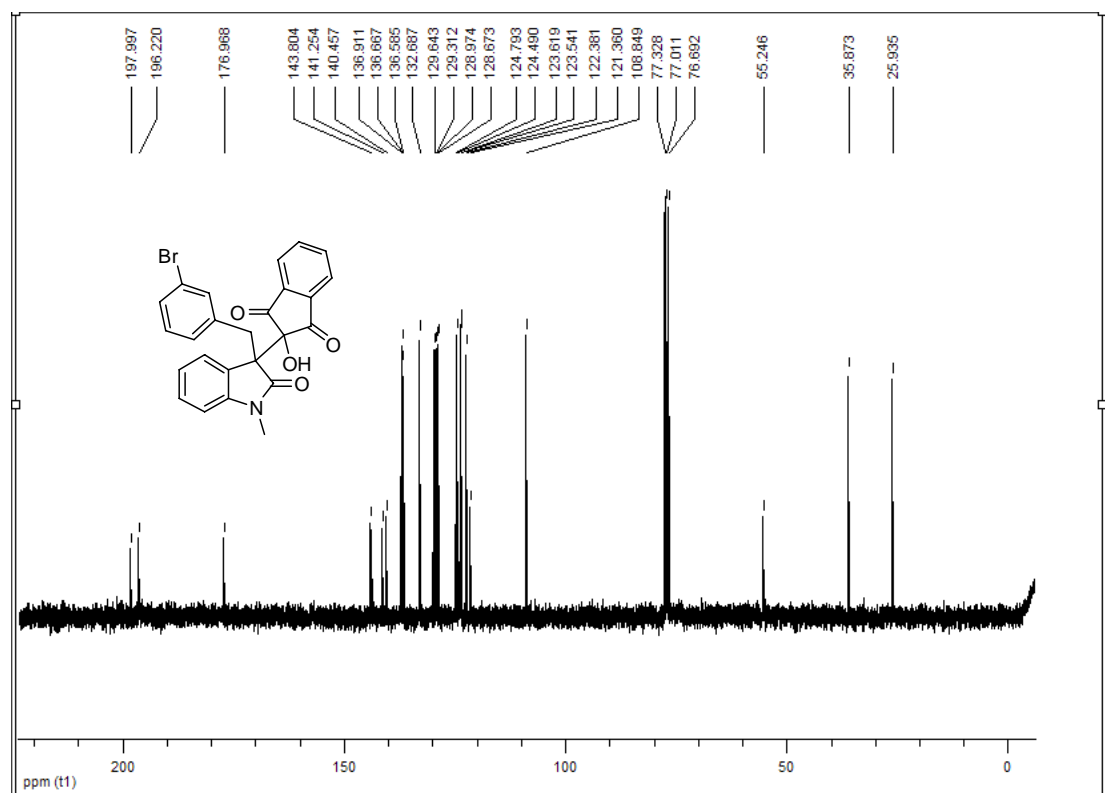

# <sup>1</sup>H and <sup>13</sup>C NMR of 3k

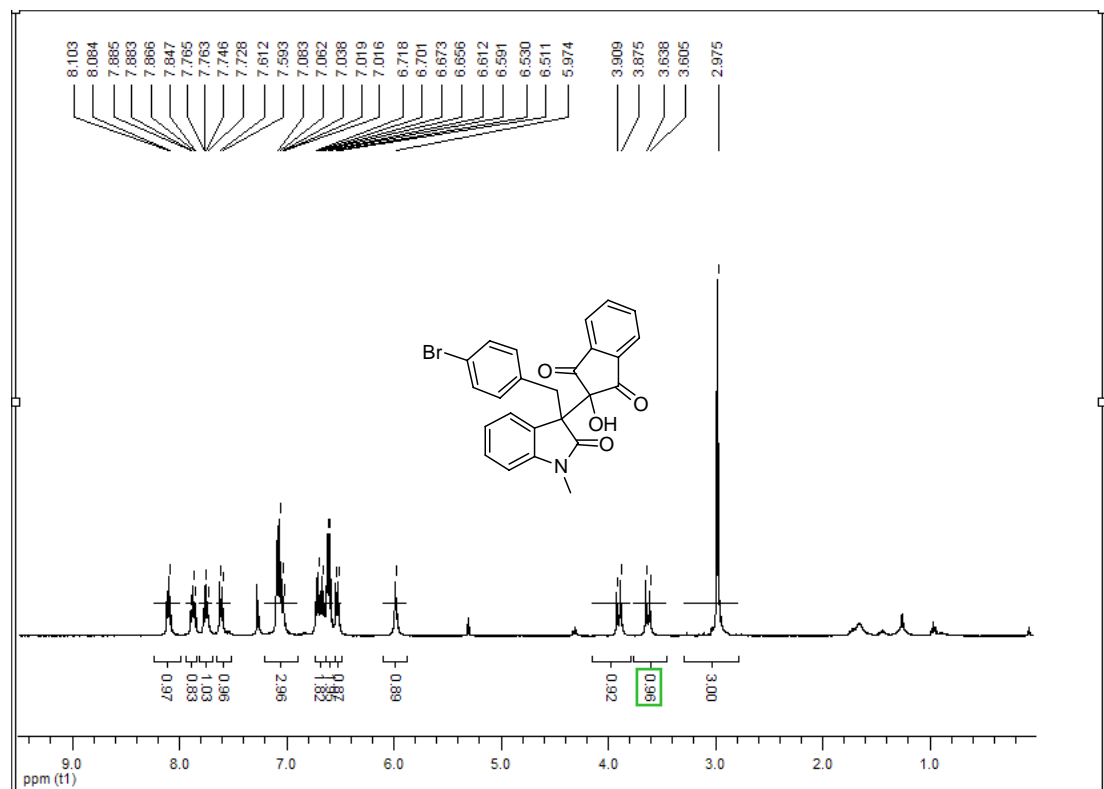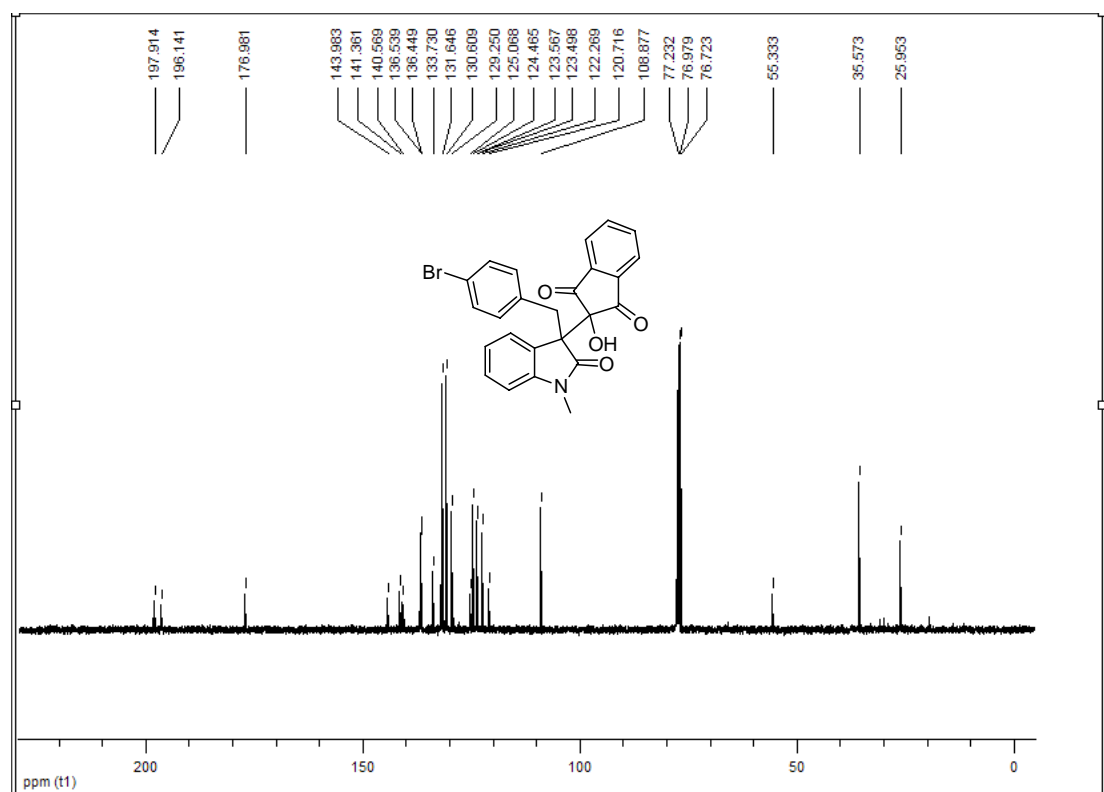

# $^1\text{H}$ and $^{13}\text{C}$ NMR of 31

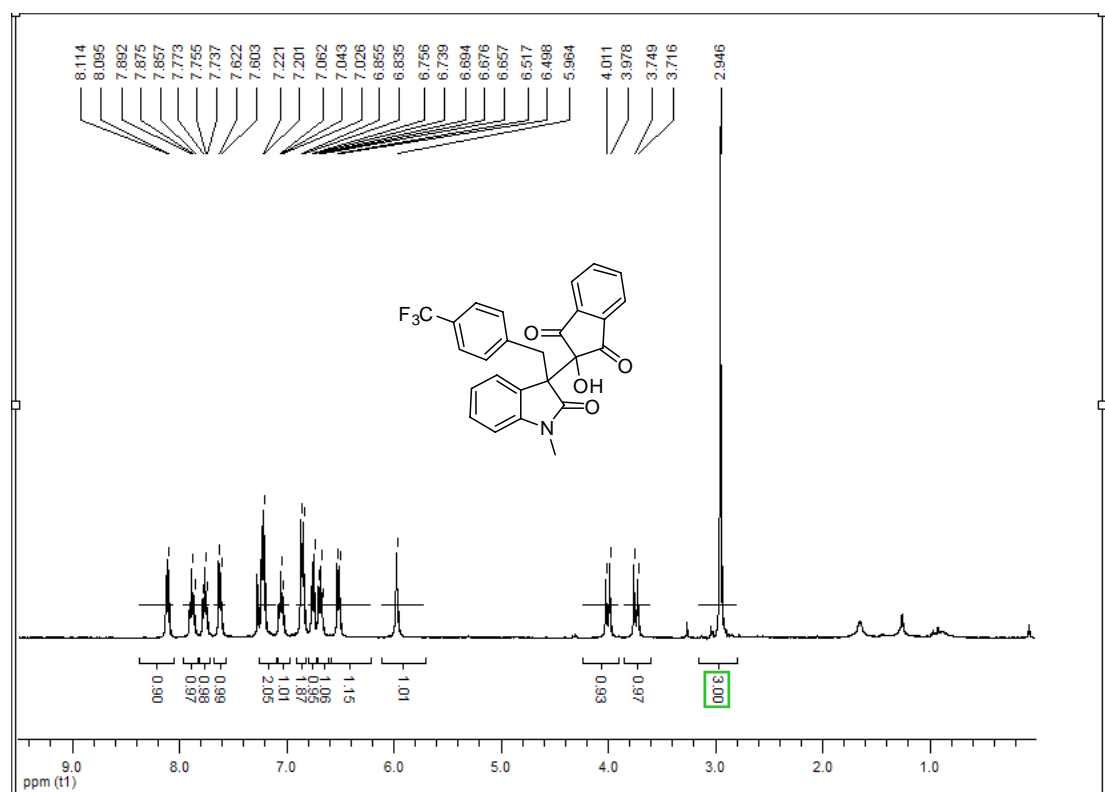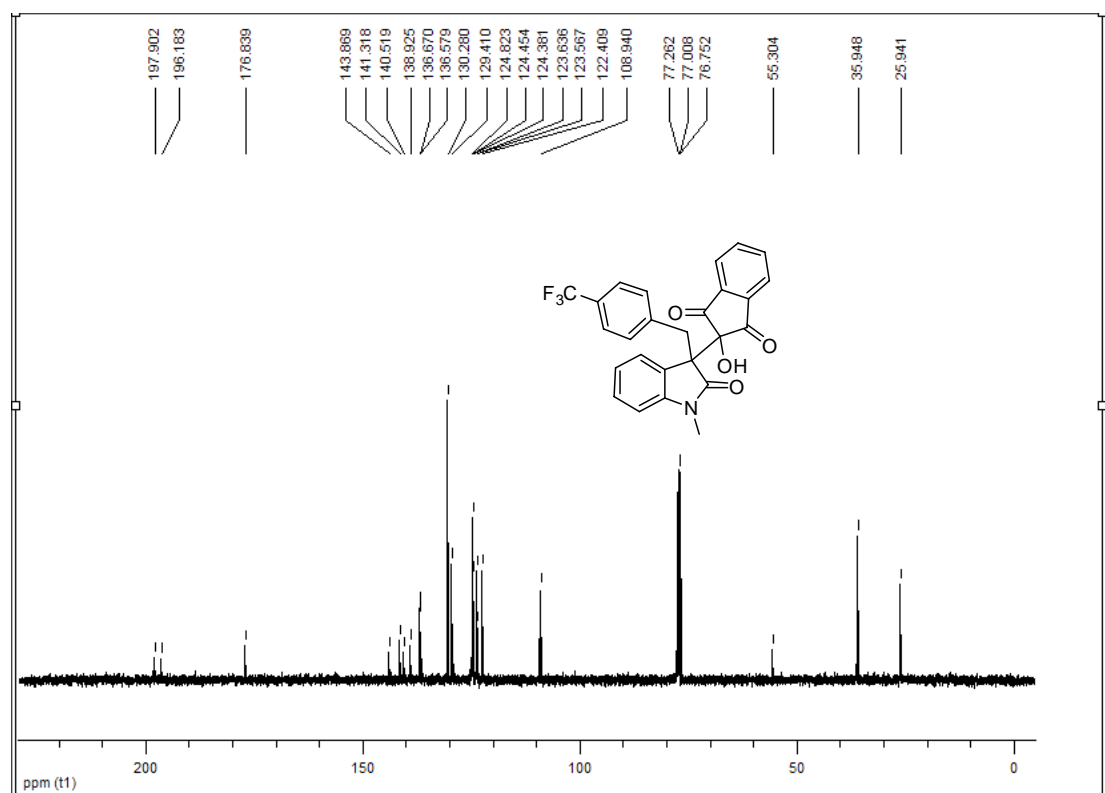





# $^1\text{H}$ and $^{13}\text{C}$ NMR of 3n

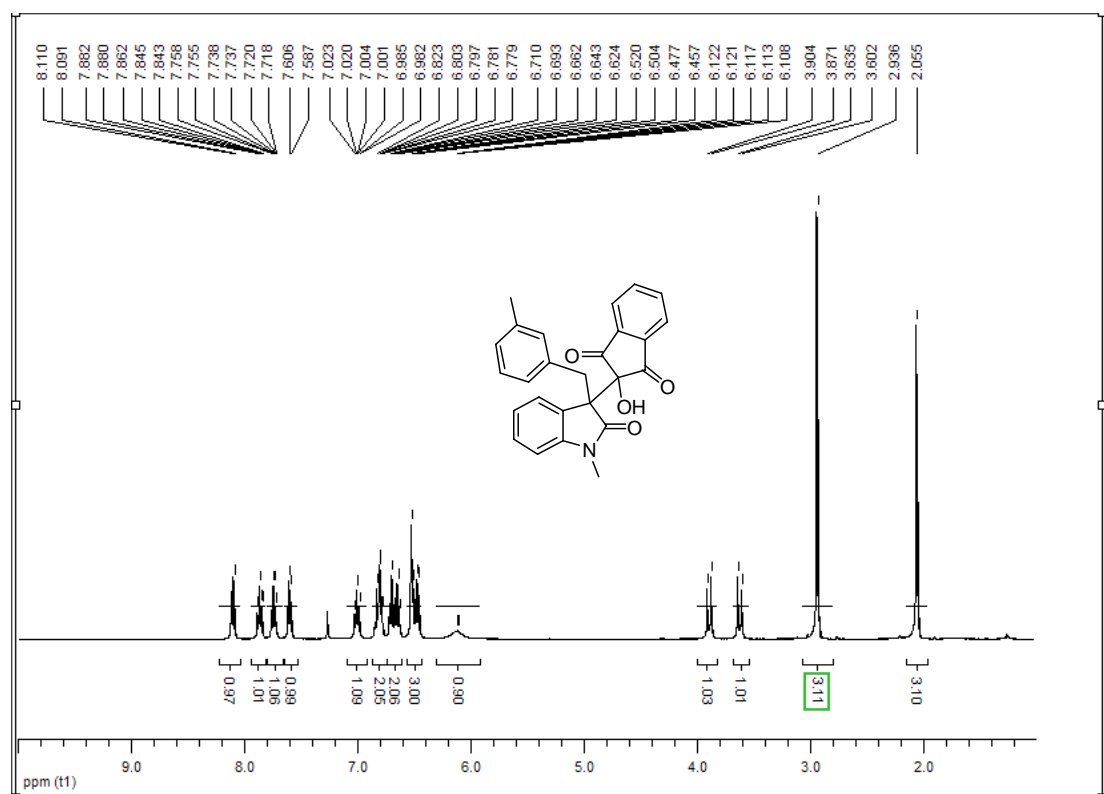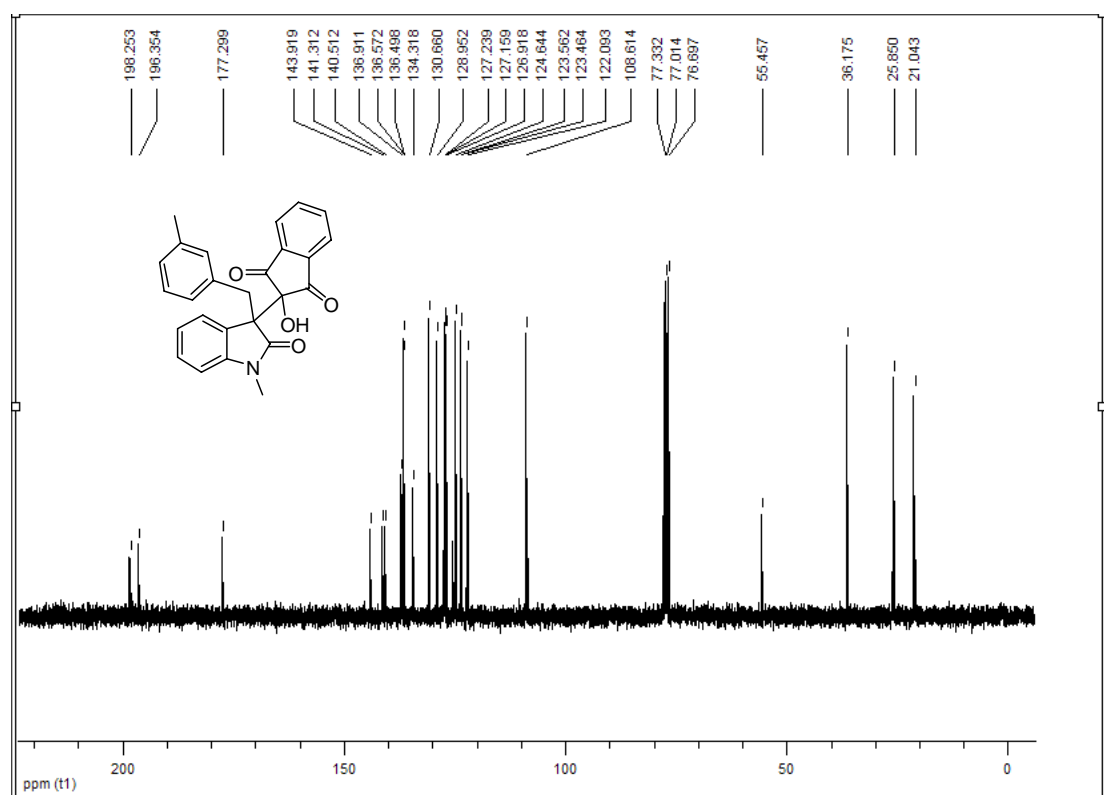

# $^1\text{H}$ and $^{13}\text{C}$ NMR of 3o

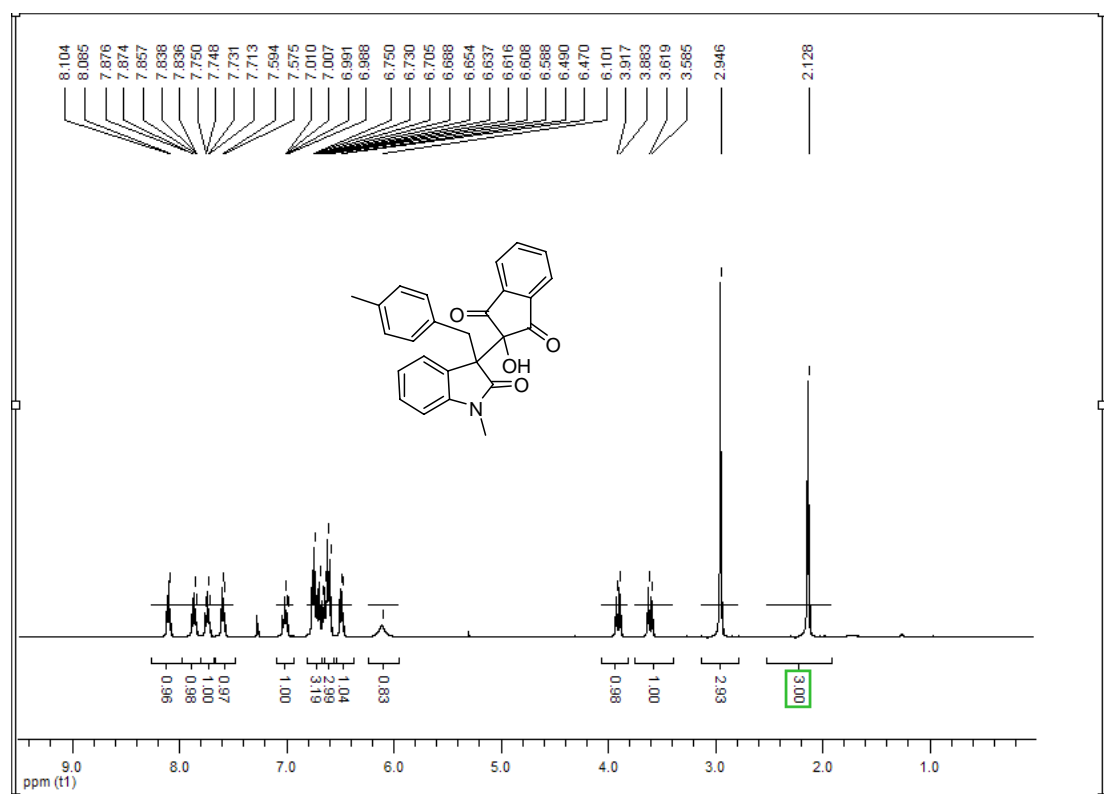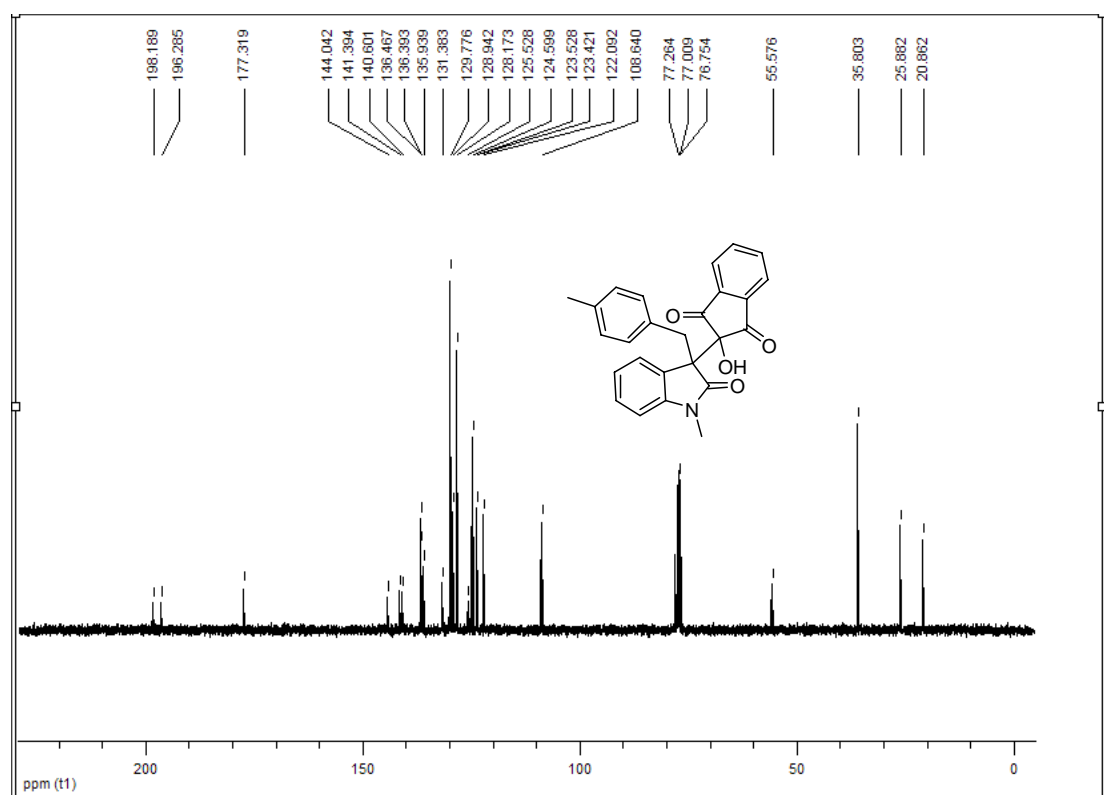

# $^1\text{H}$ and $^{13}\text{C}$ NMR of 3p

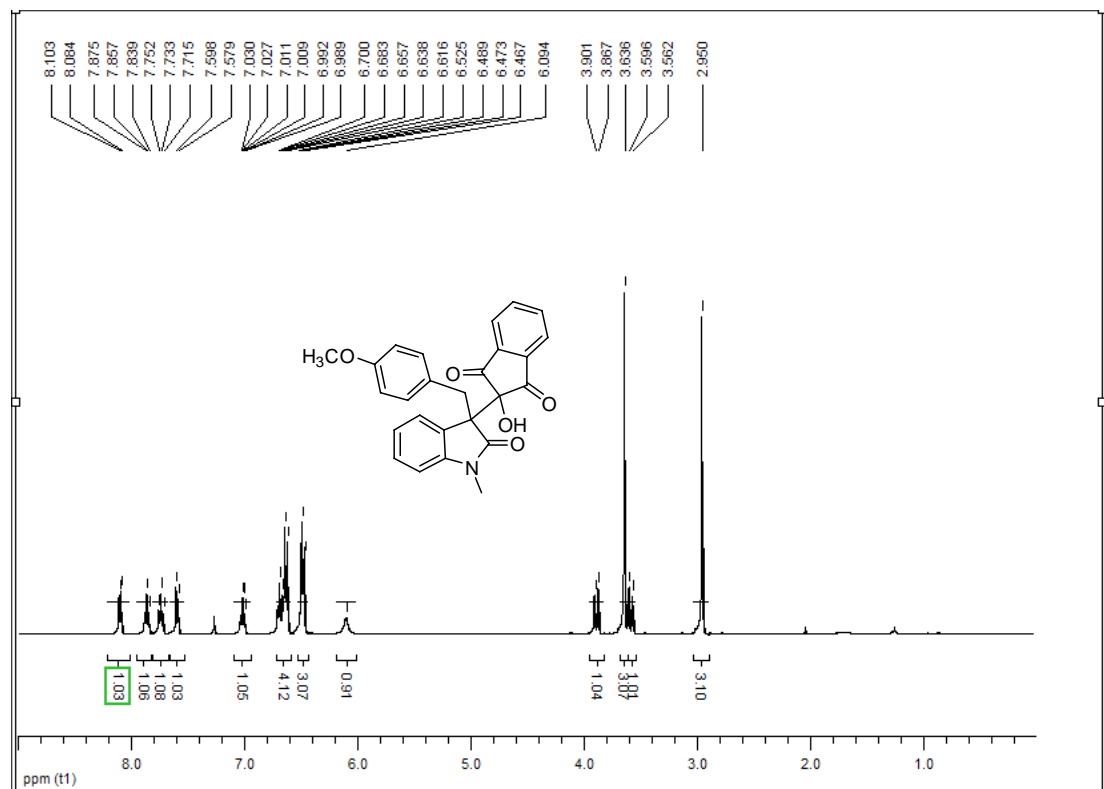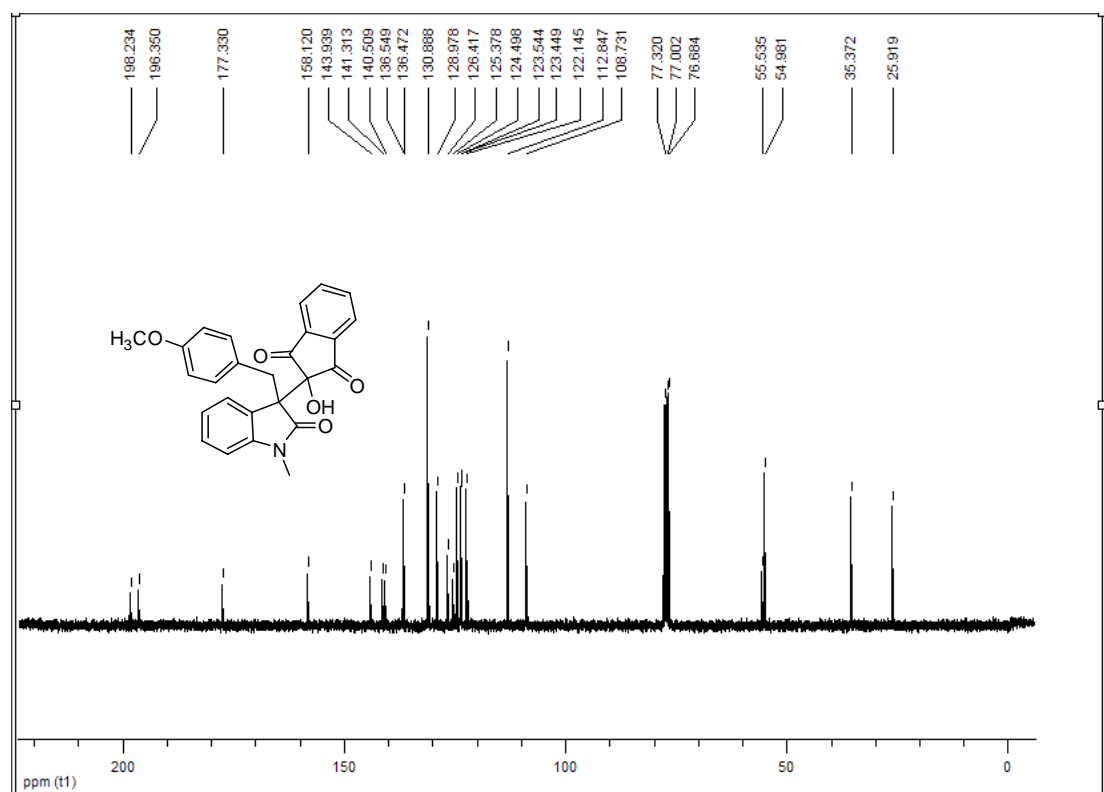



# $^1\text{H}$ and $^{13}\text{C}$ NMR of 3r

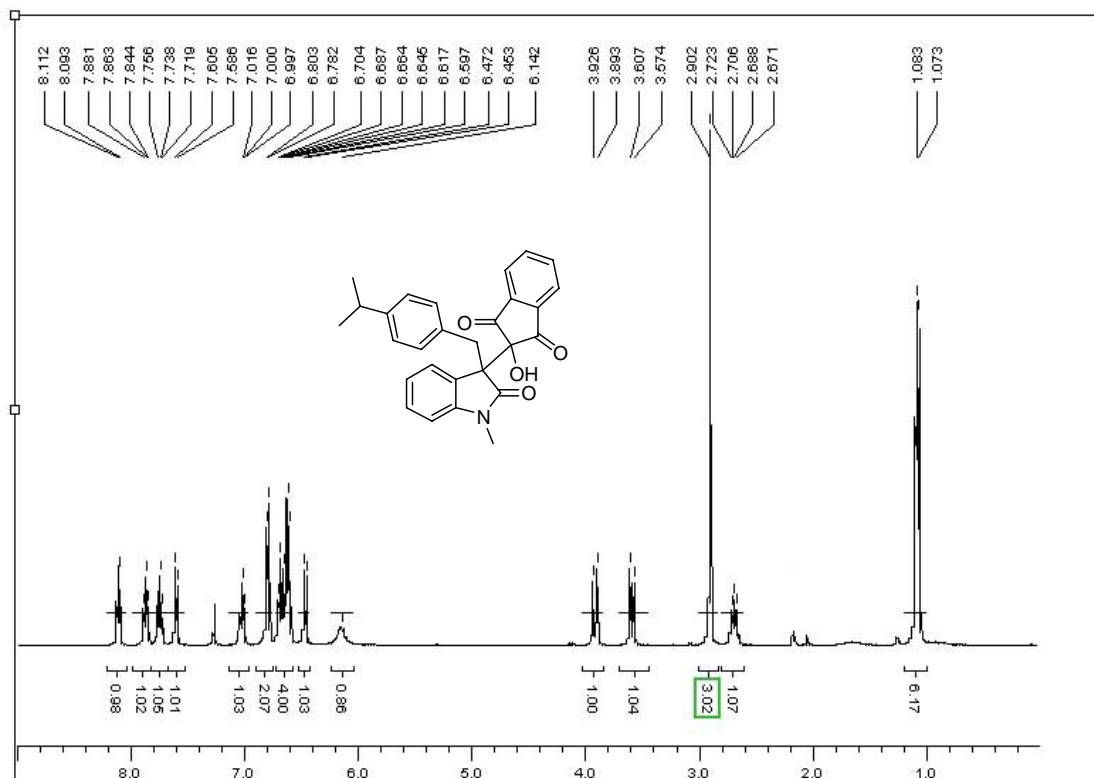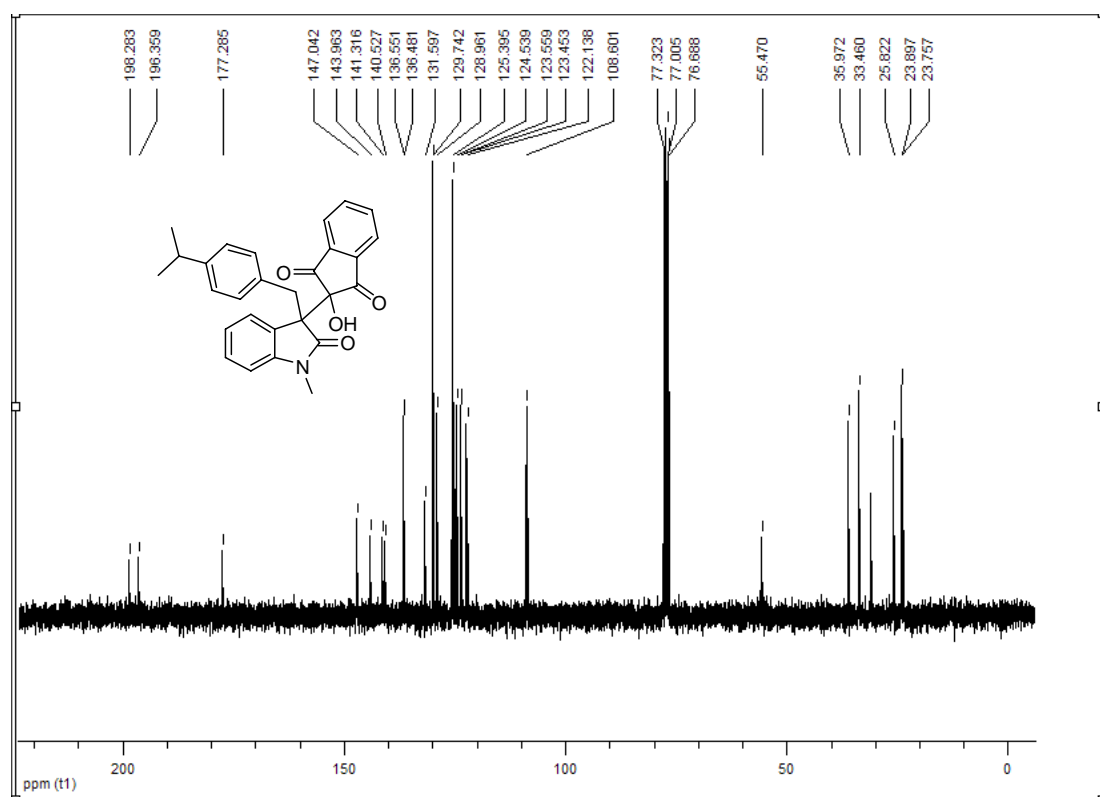

# <sup>1</sup>H and <sup>13</sup>C NMR of 3s

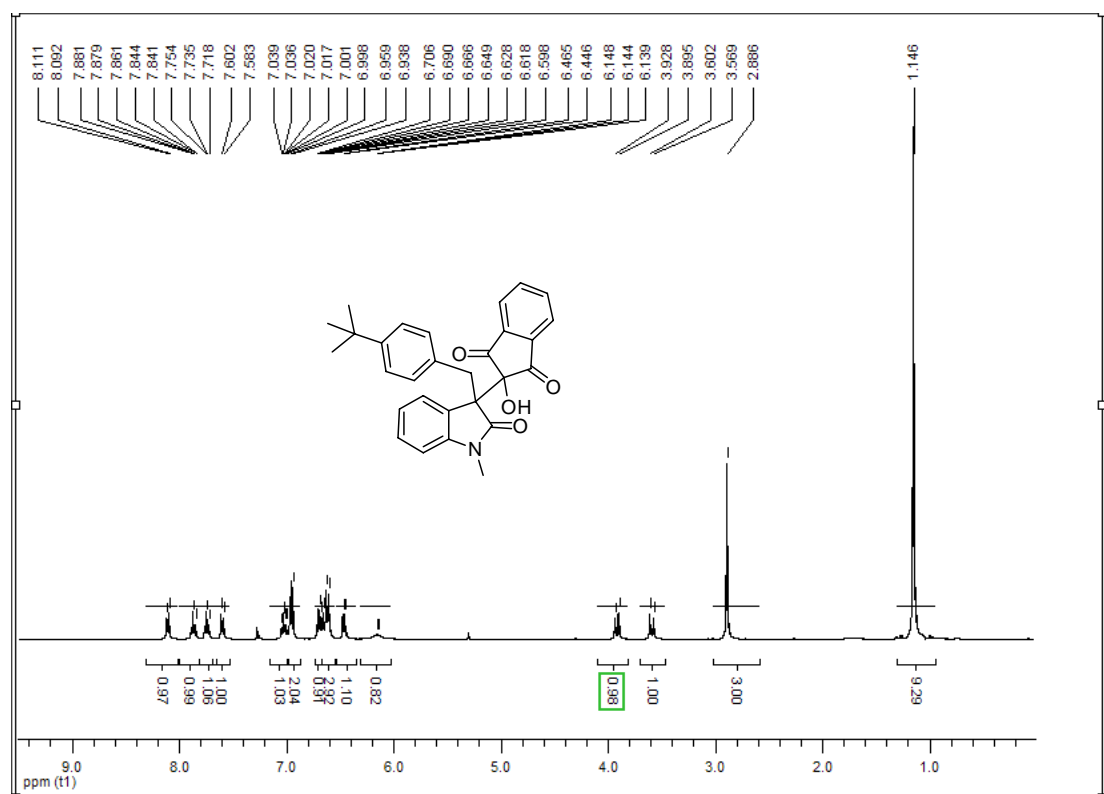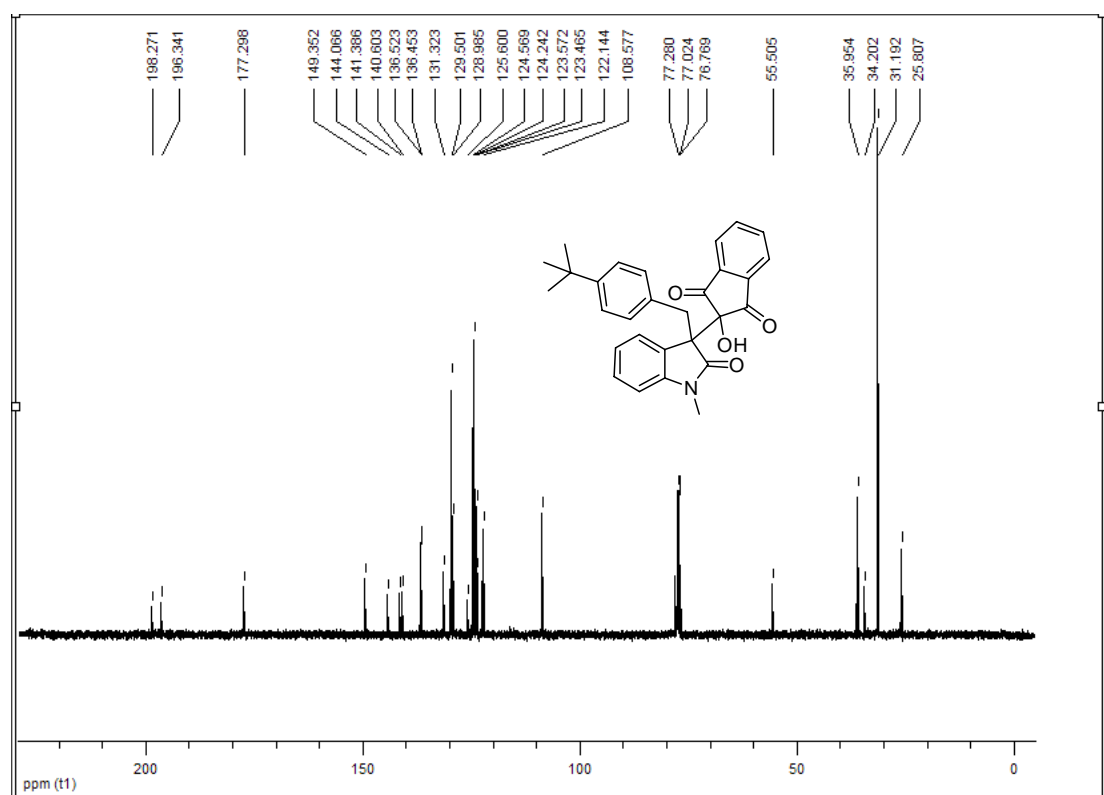

# $^1\text{H}$ and $^{13}\text{C}$ NMR of 3t

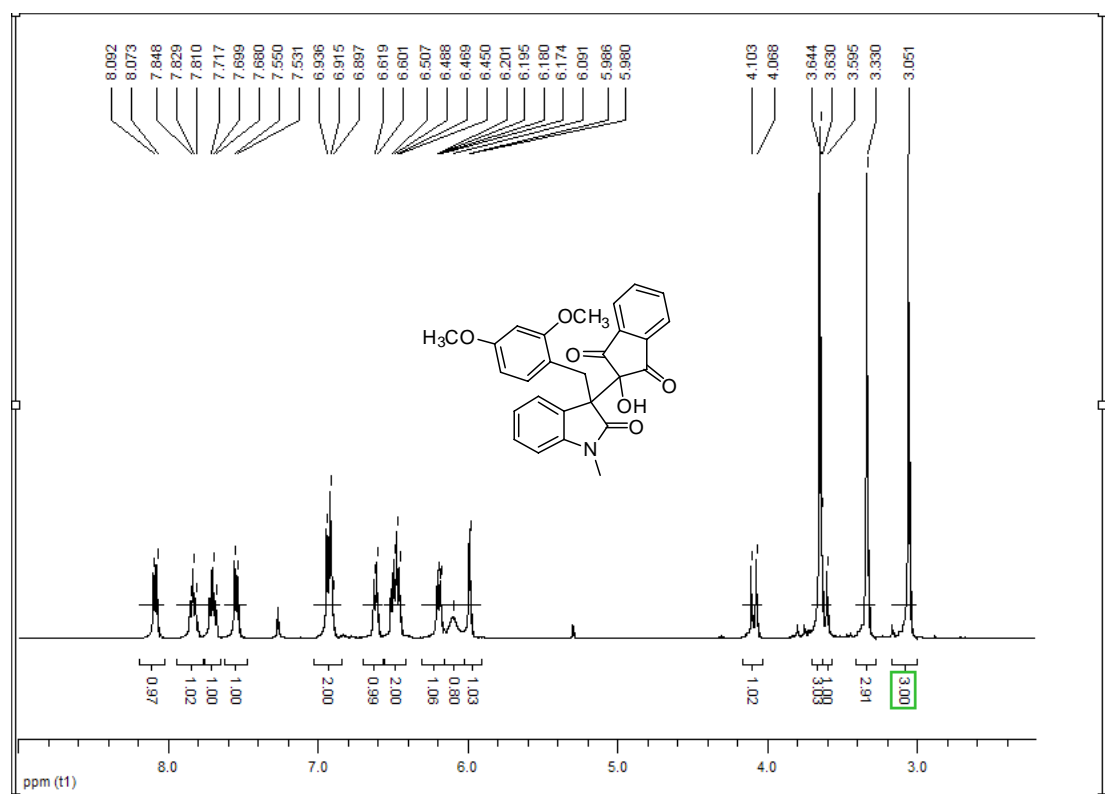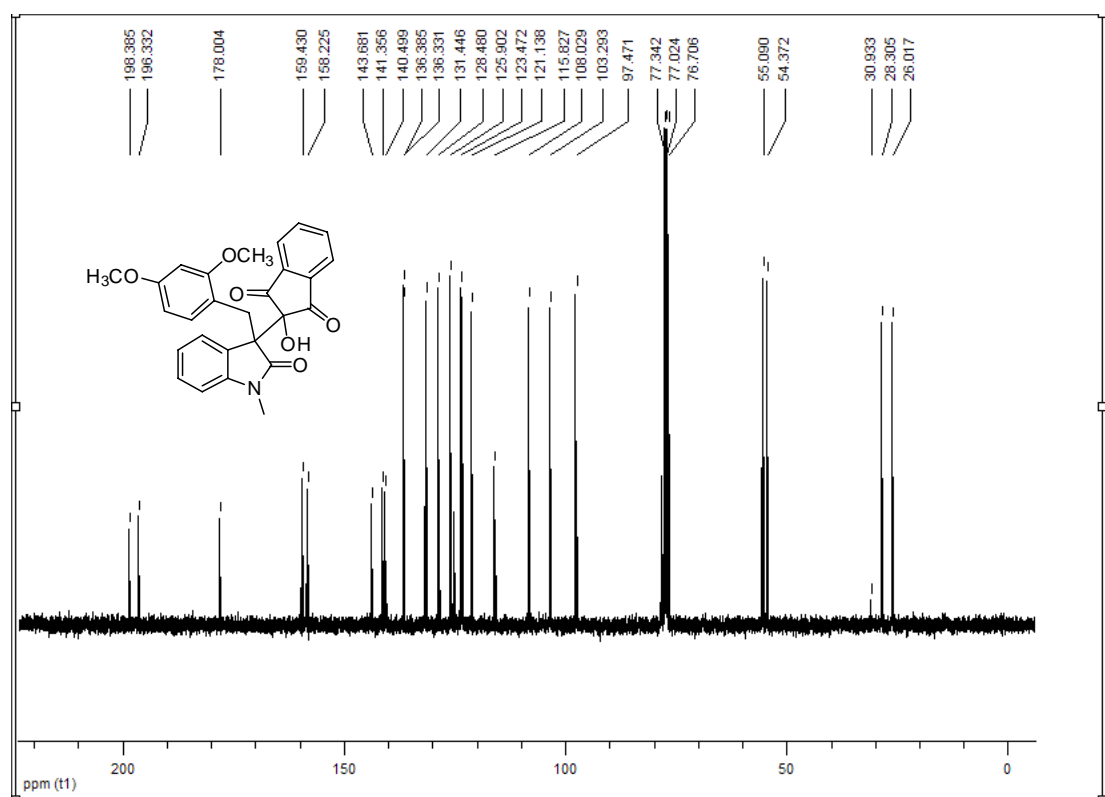



# <sup>1</sup>H and <sup>13</sup>C NMR of 3u

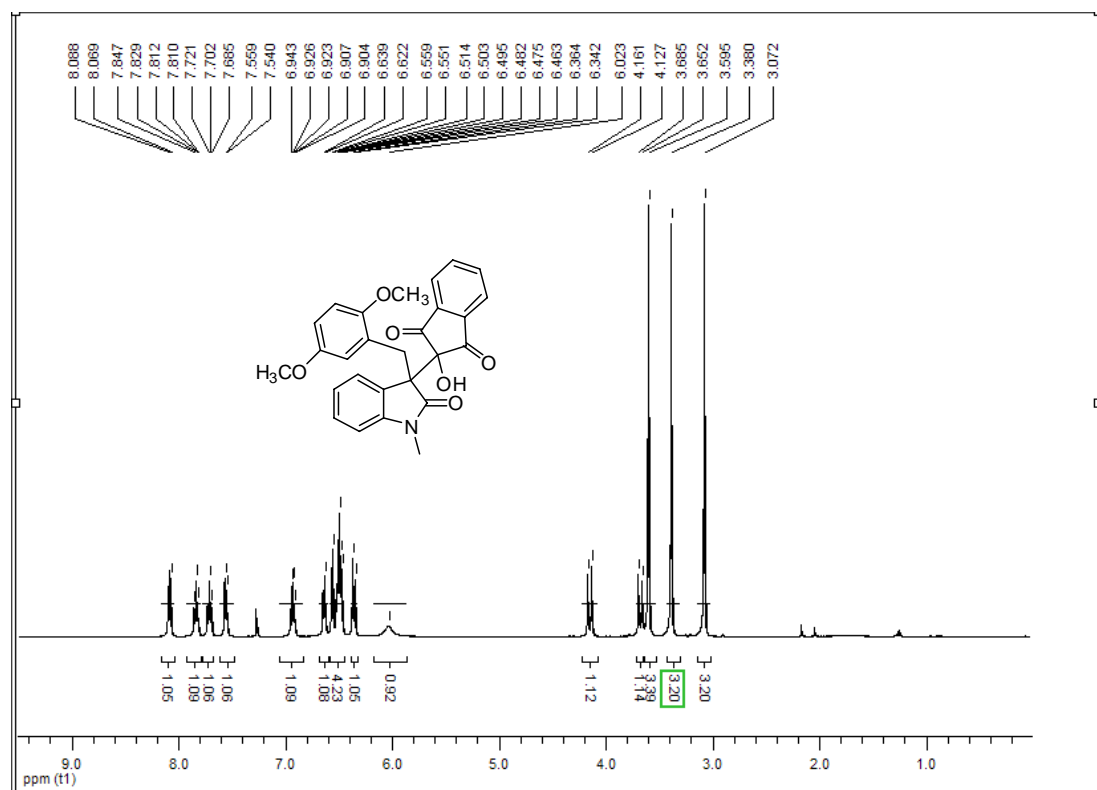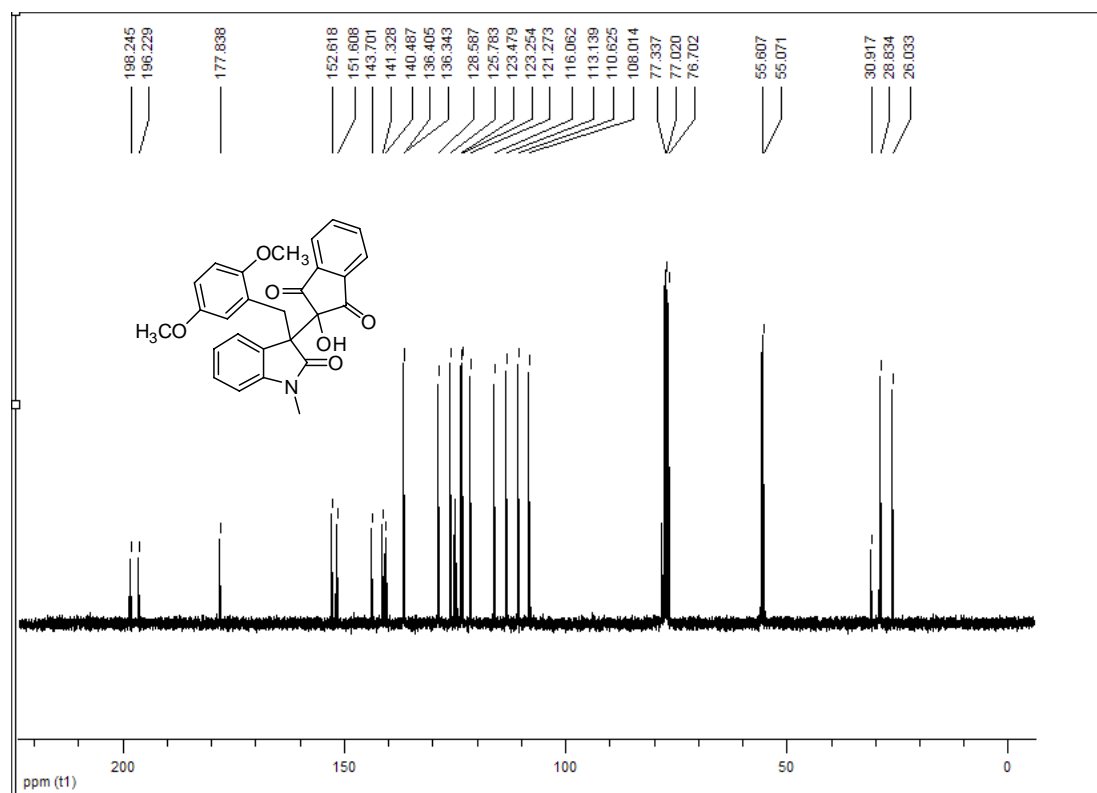

# <sup>1</sup>H and <sup>13</sup>C NMR of 3v

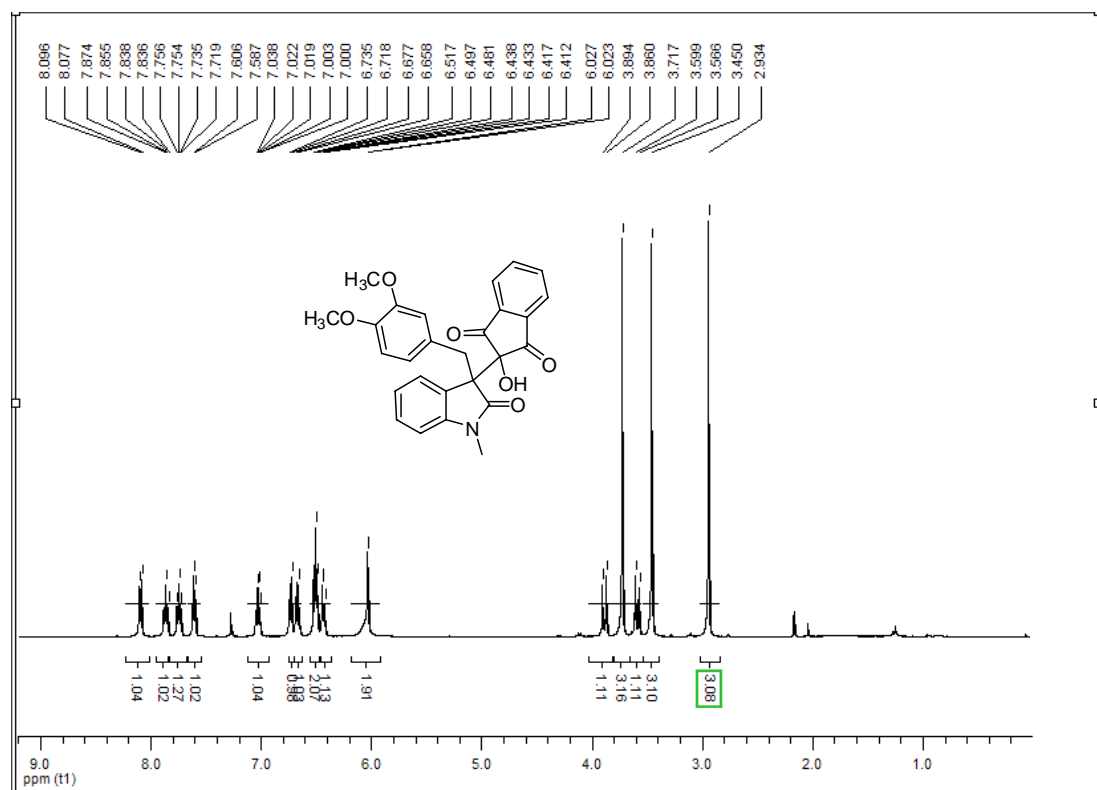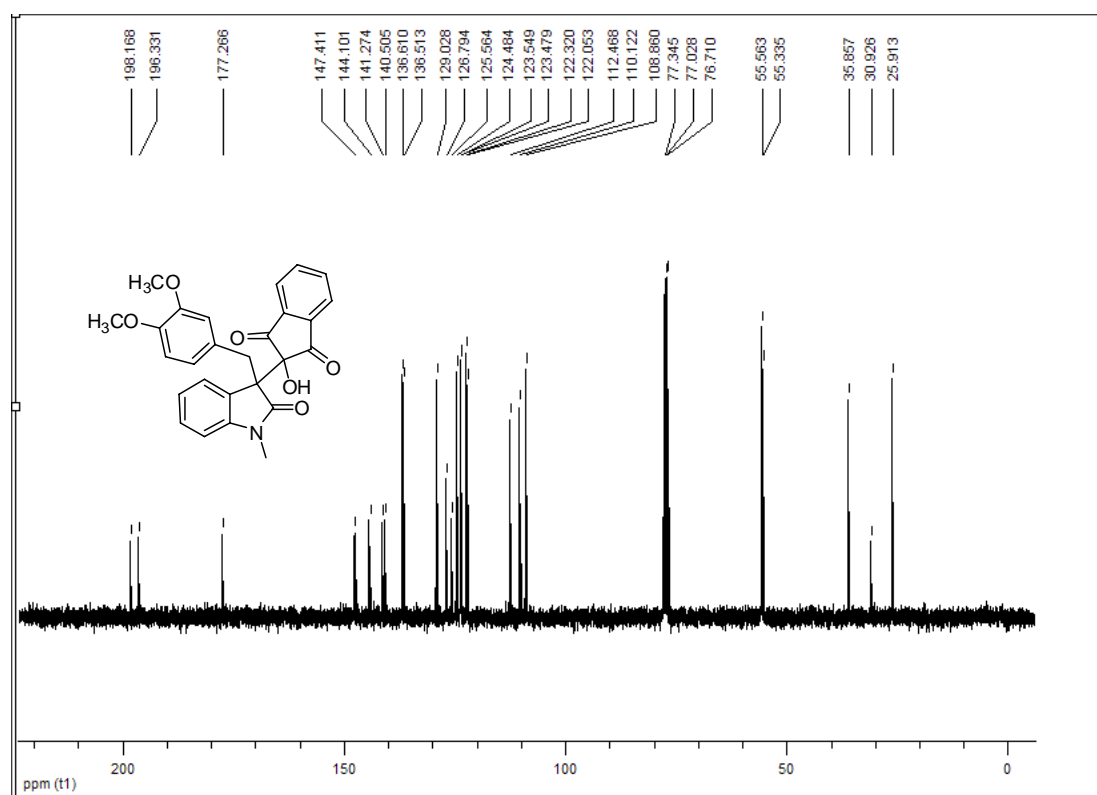

# $^1\text{H}$ and $^{13}\text{C}$ NMR of 3w

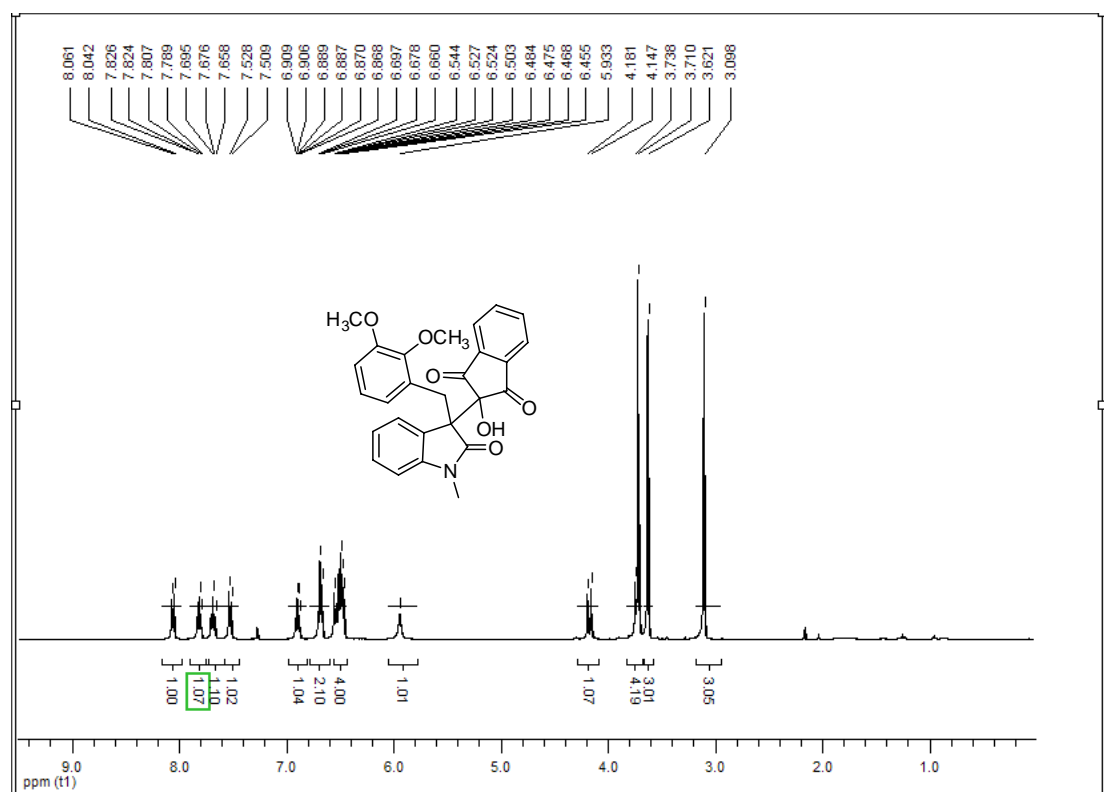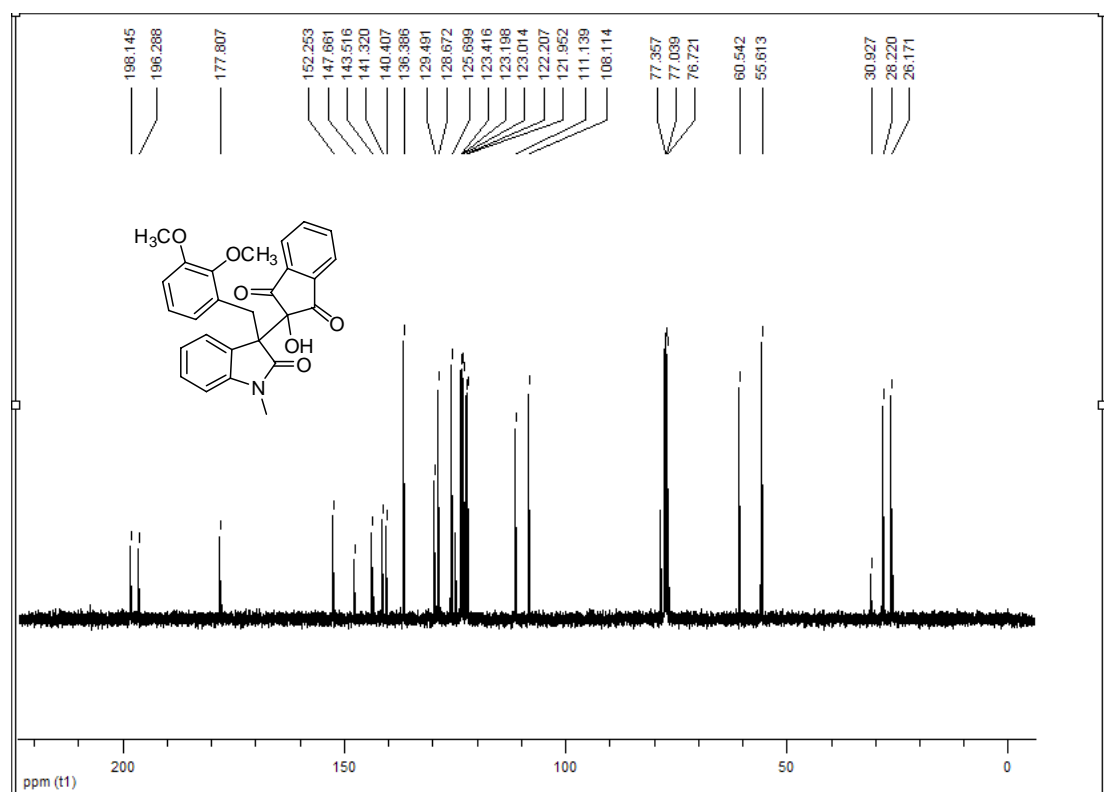

# $^1\text{H}$ and $^{13}\text{C}$ NMR of 3x

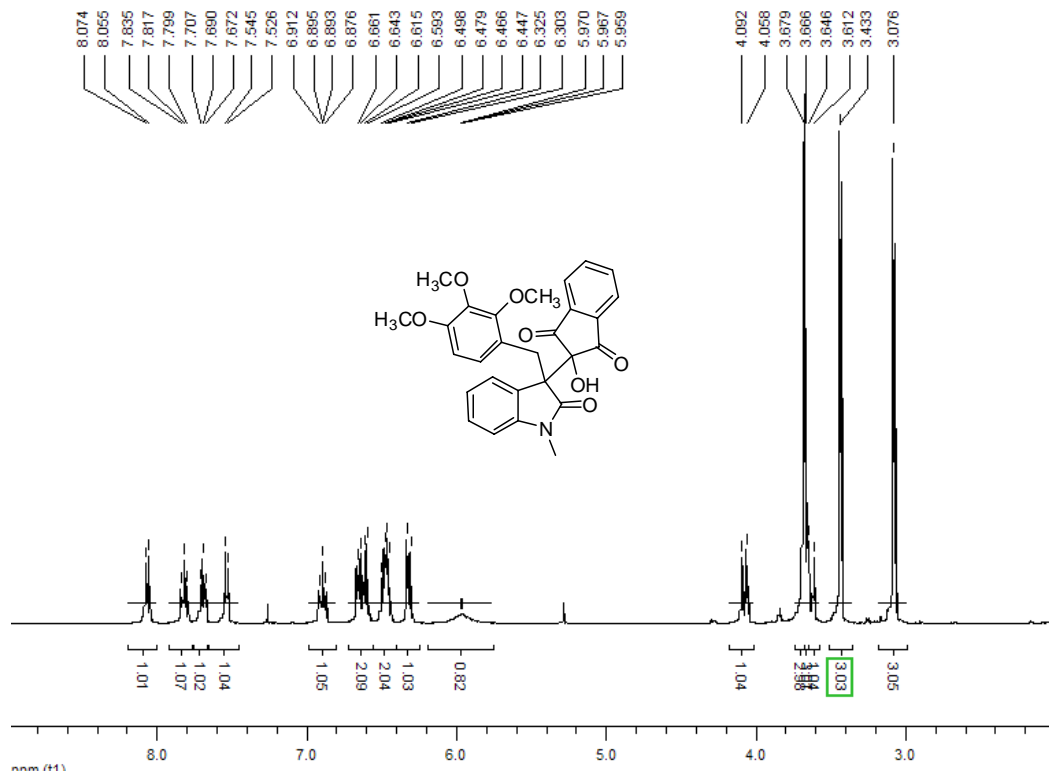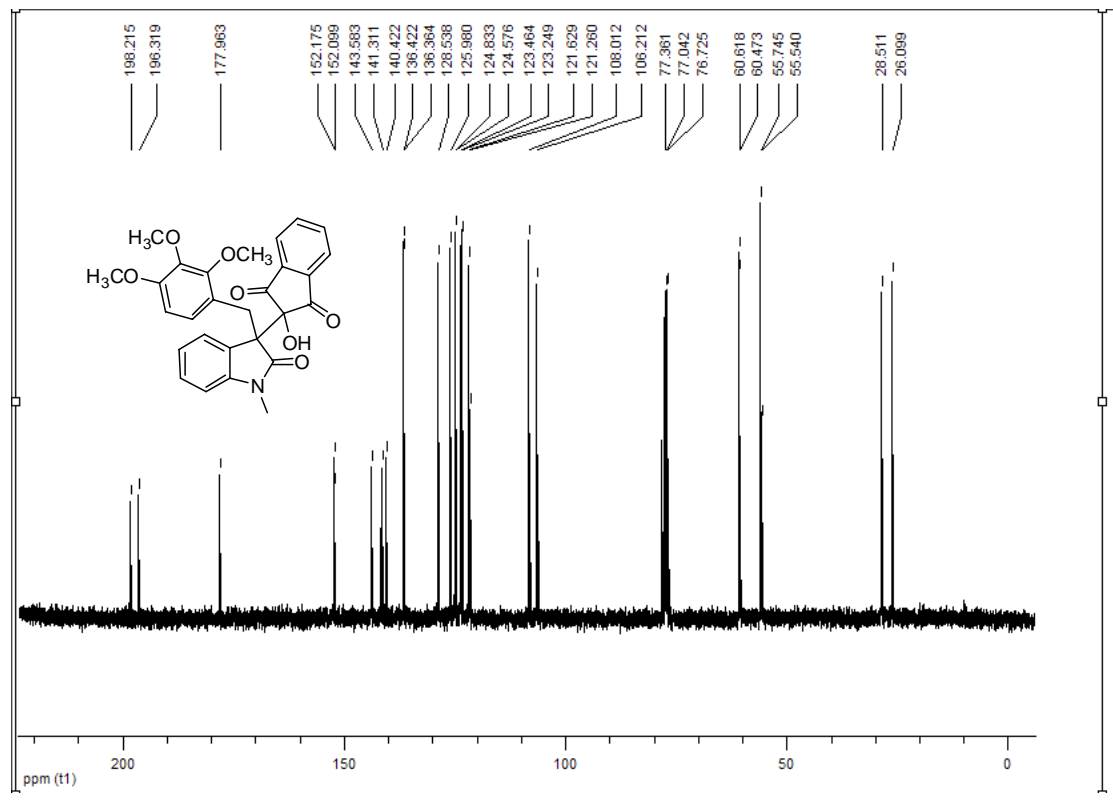



# <sup>1</sup>H and <sup>13</sup>C NMR of 3z

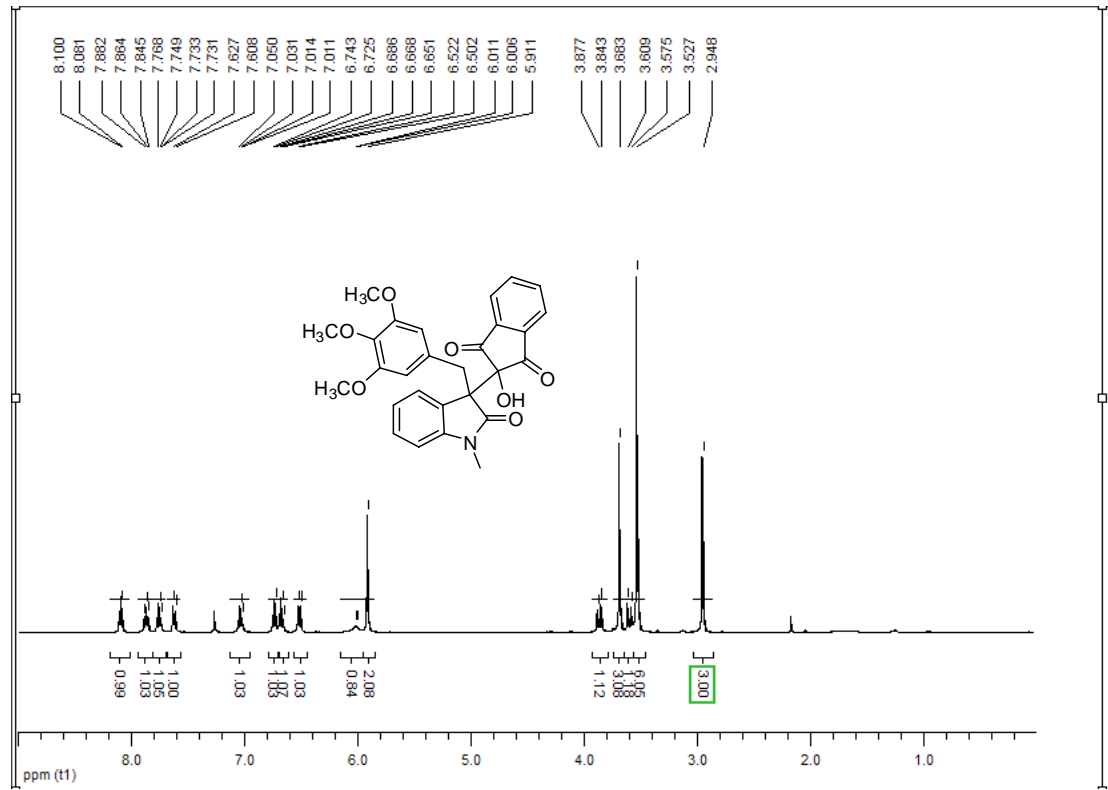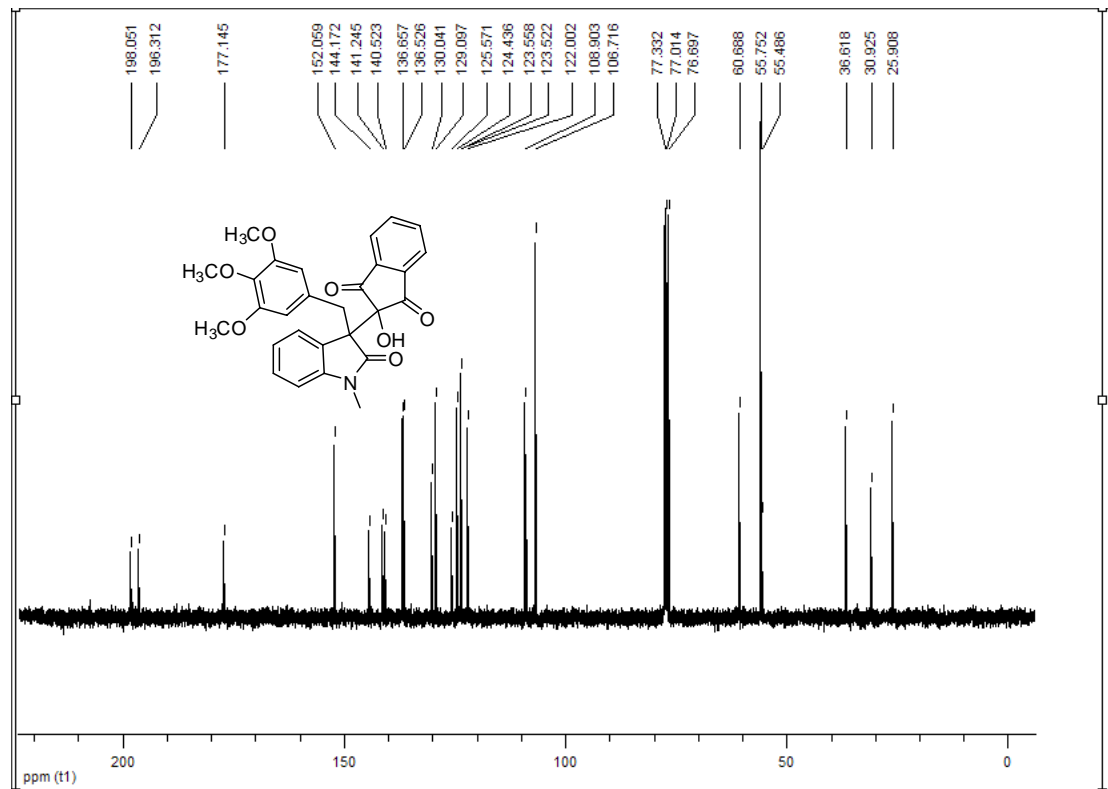

# $^1\text{H}$ and $^{13}\text{C}$ NMR of 3a'

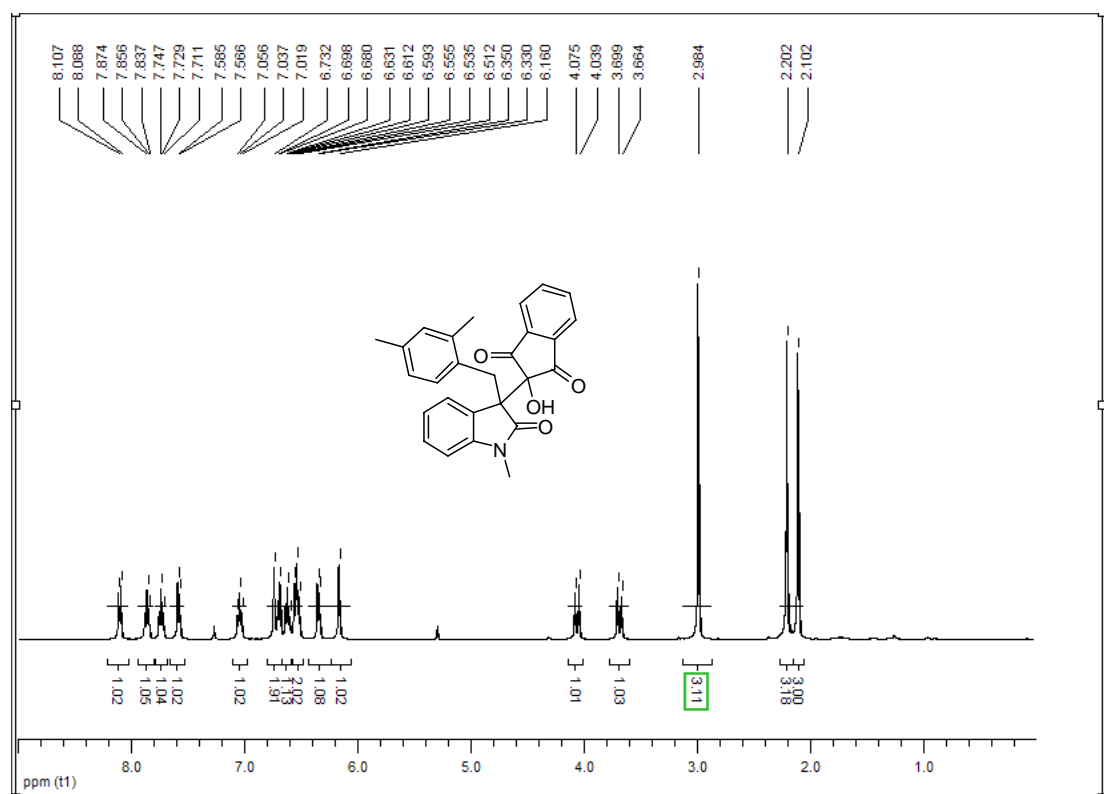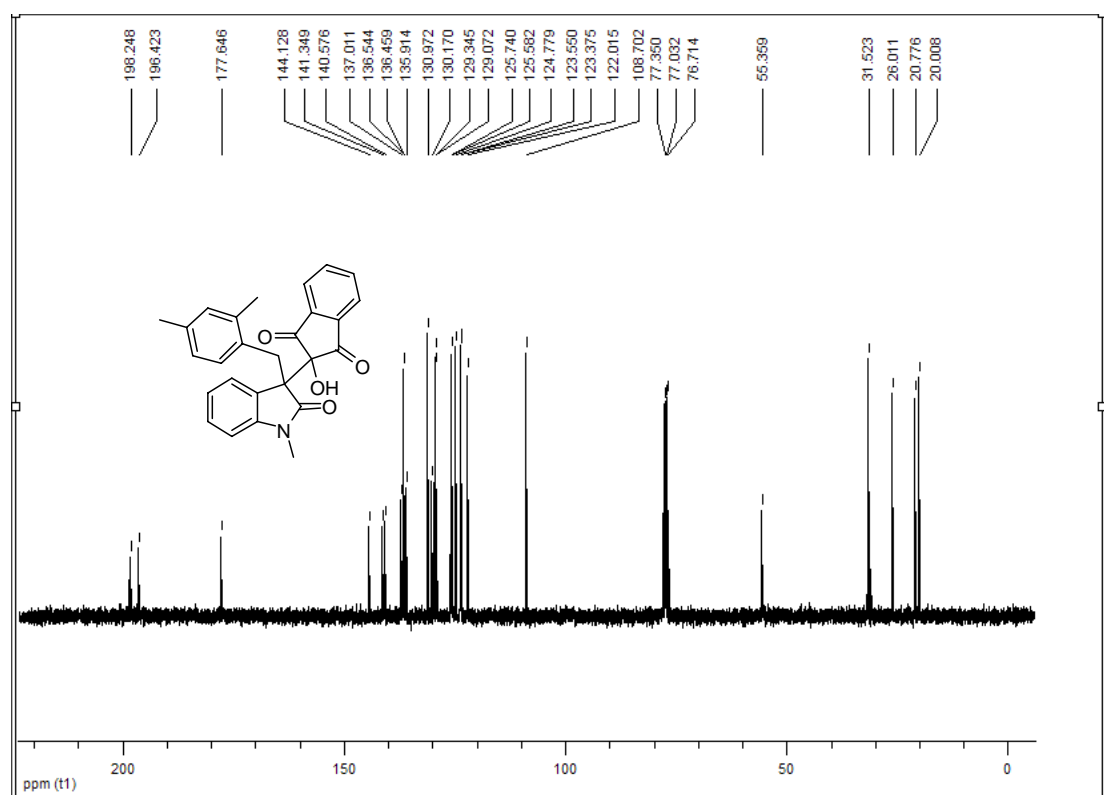

# <sup>1</sup>H and <sup>13</sup>C NMR of 3b'

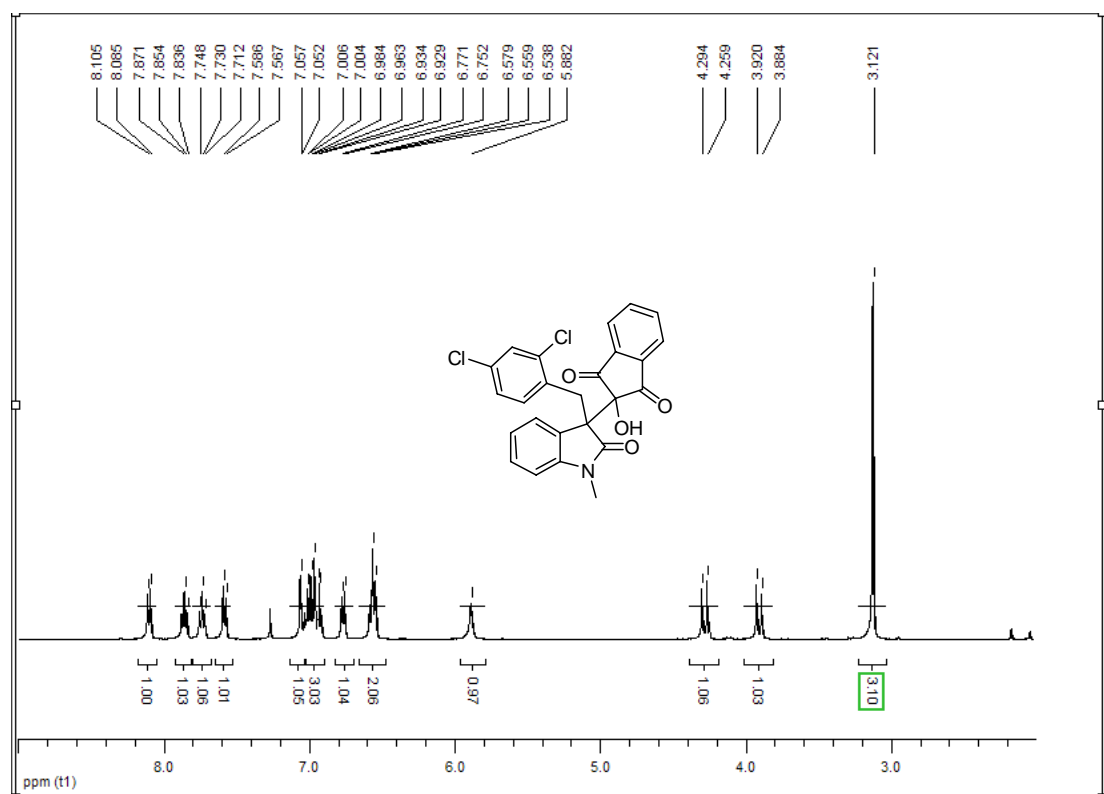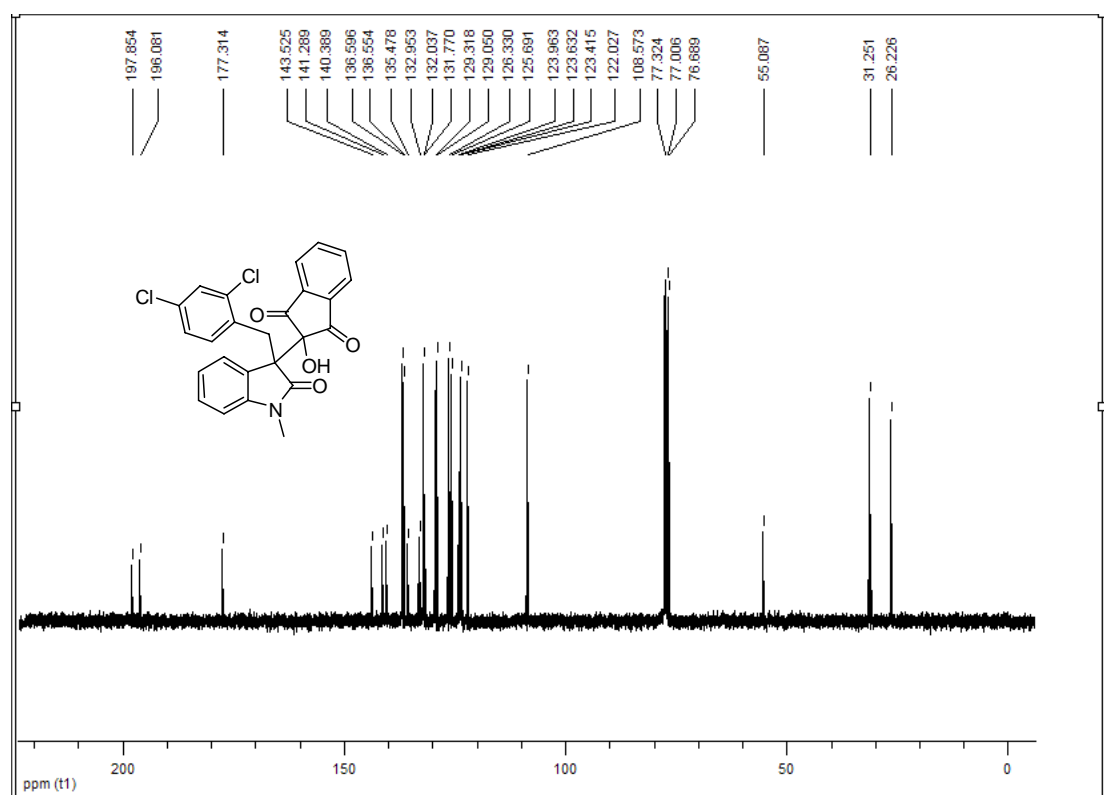



# $^1\text{H}$ and $^{13}\text{C}$ NMR of 3c'

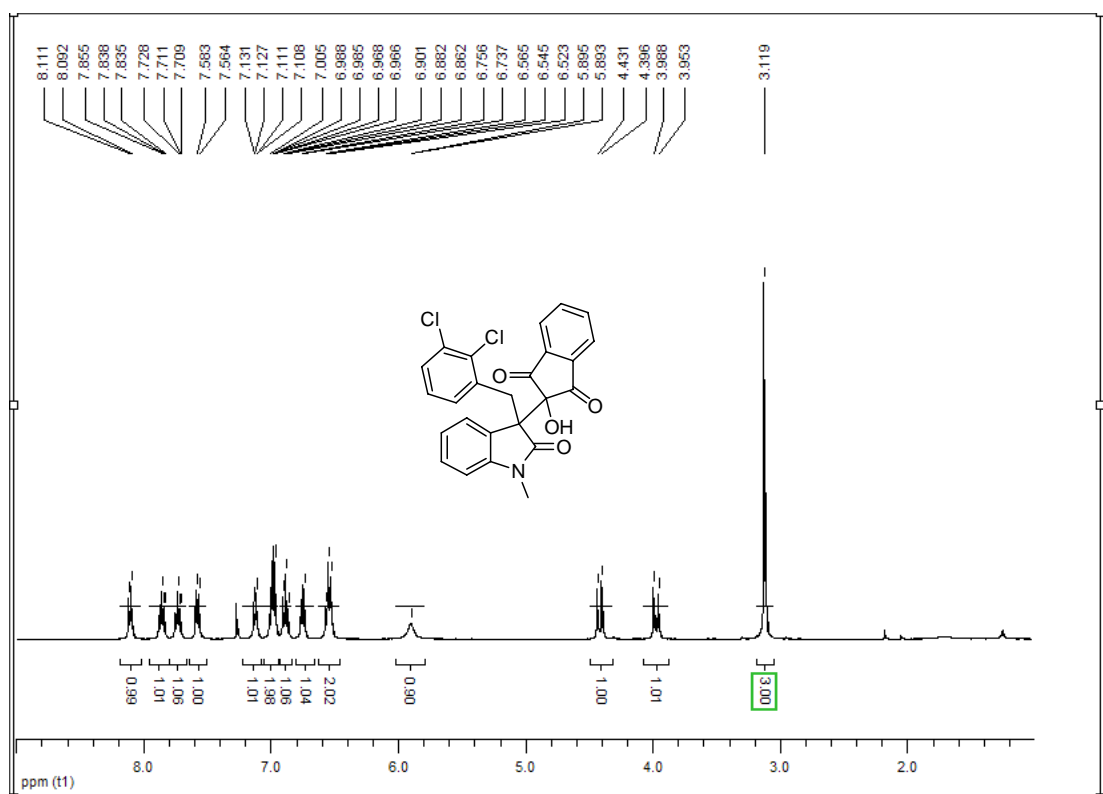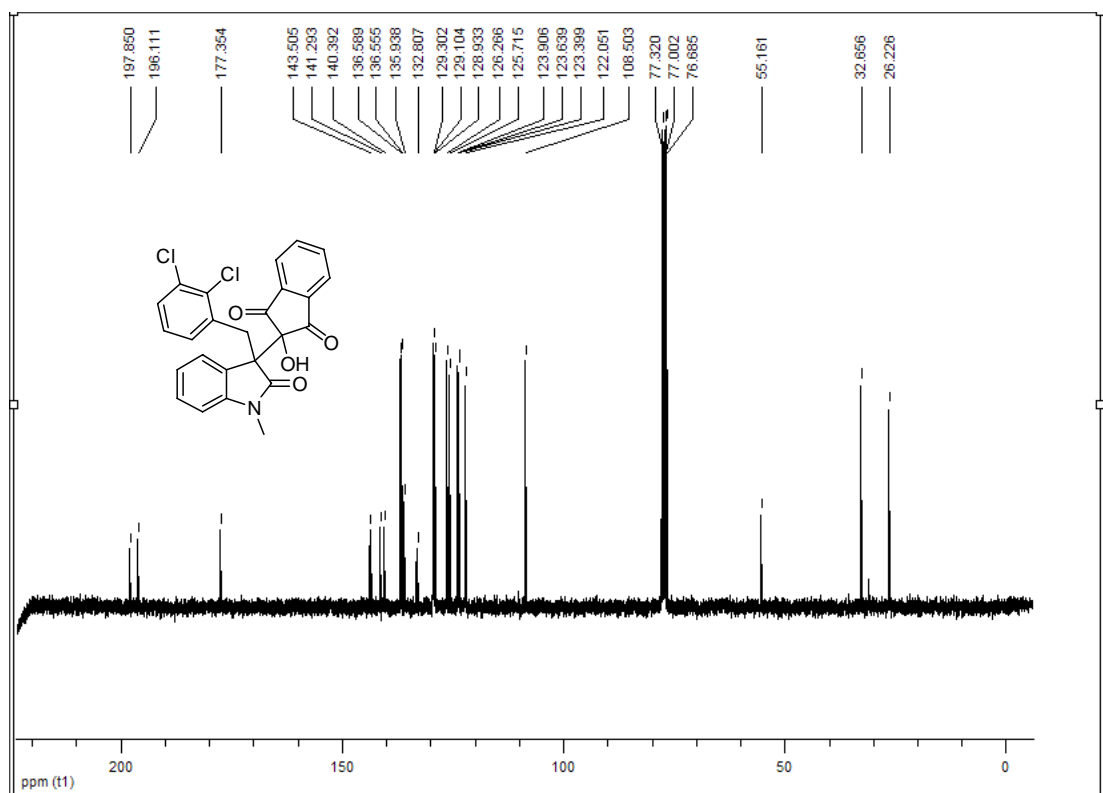

# <sup>1</sup>H and <sup>13</sup>C NMR of 3d'

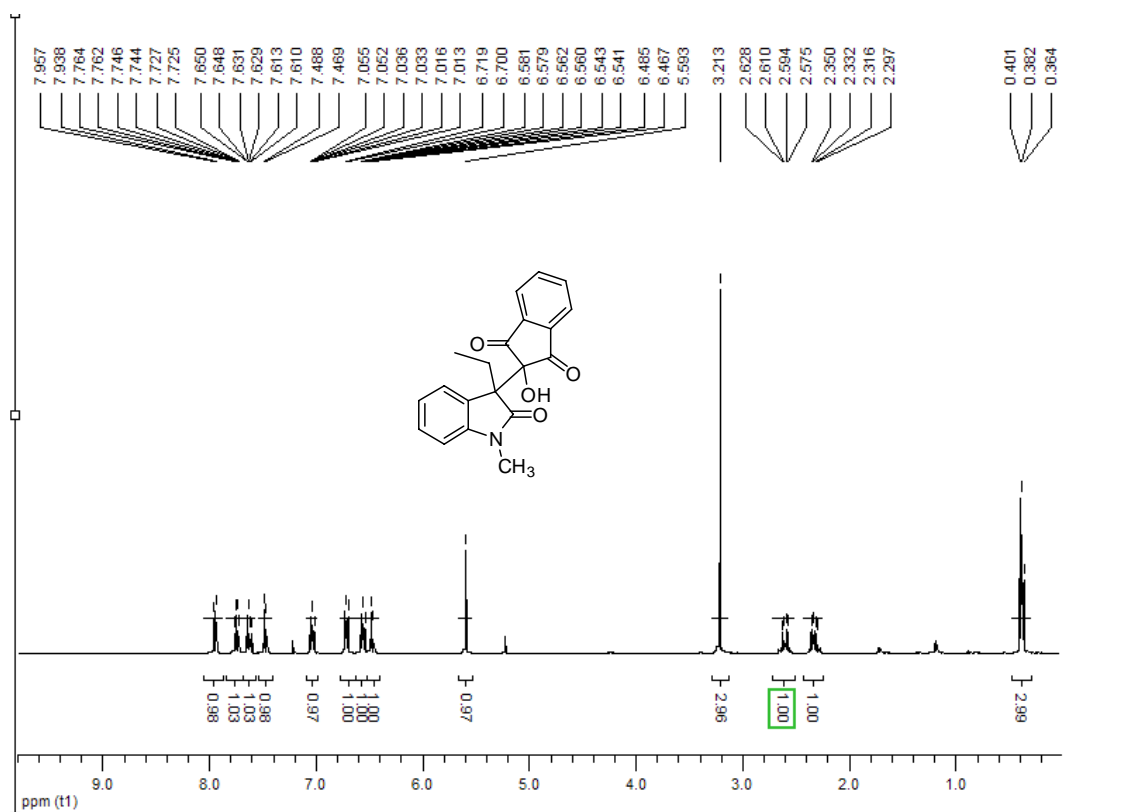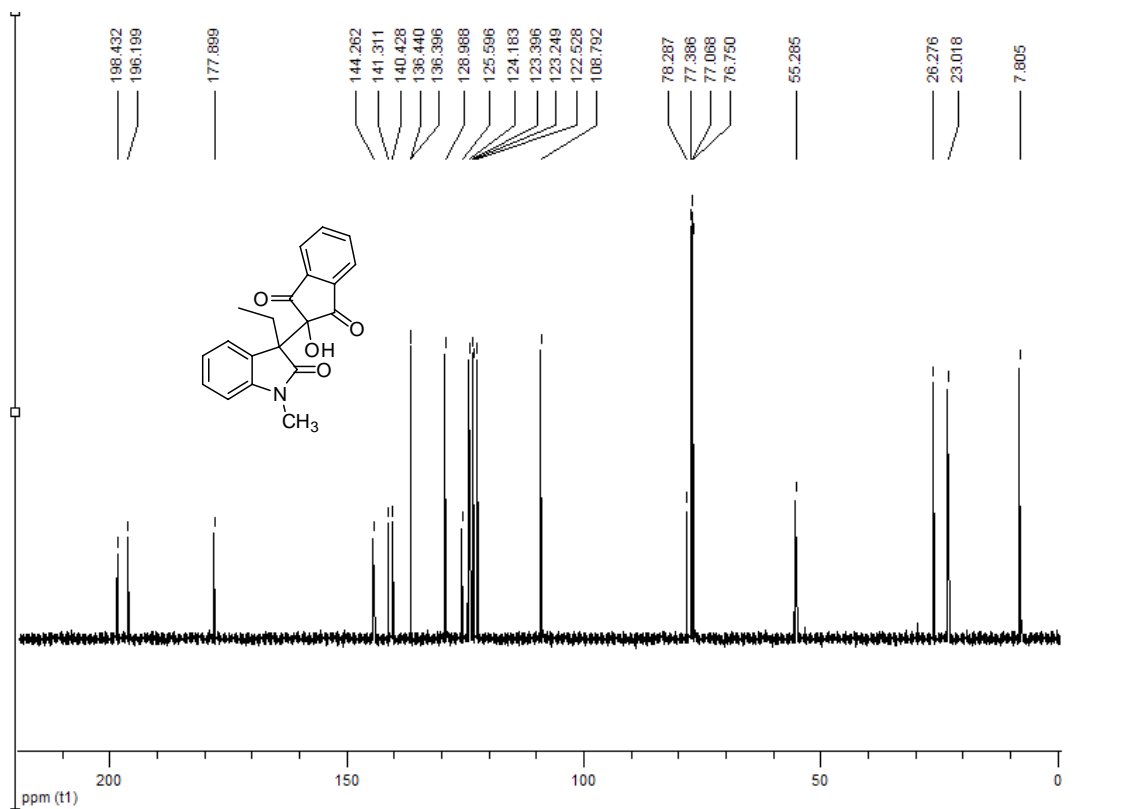

# $^1\text{H}$ and $^{13}\text{C}$ NMR of 3e'

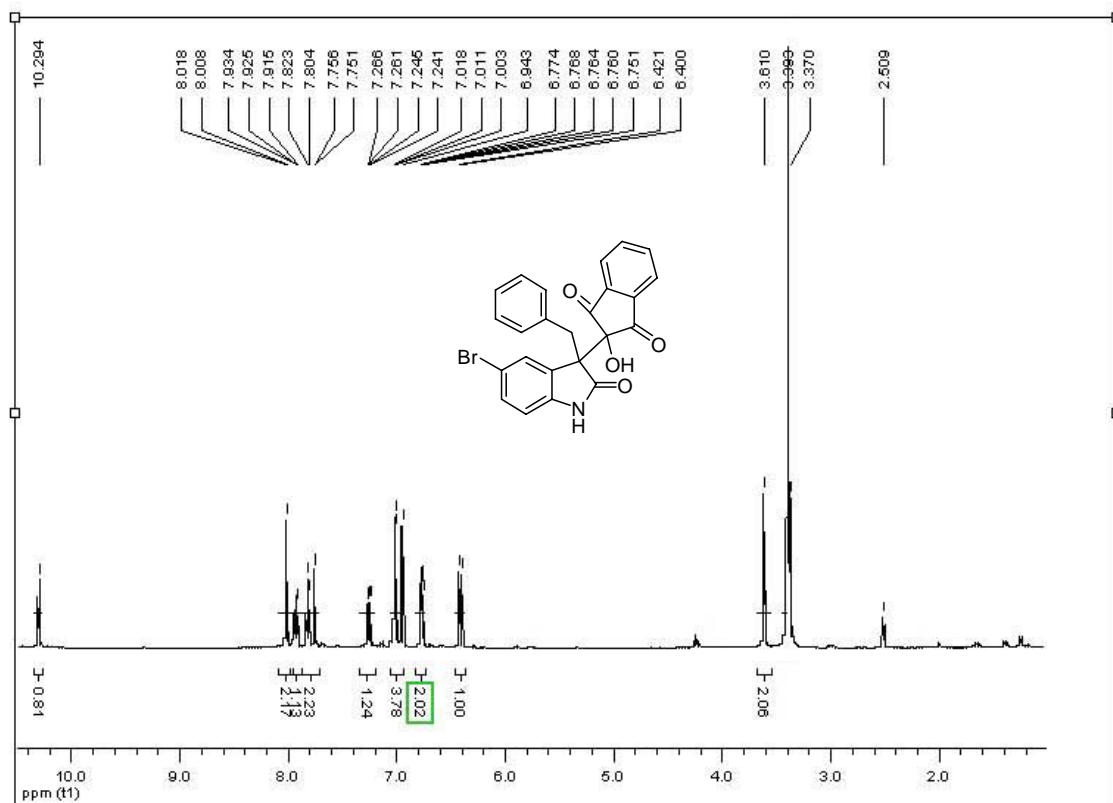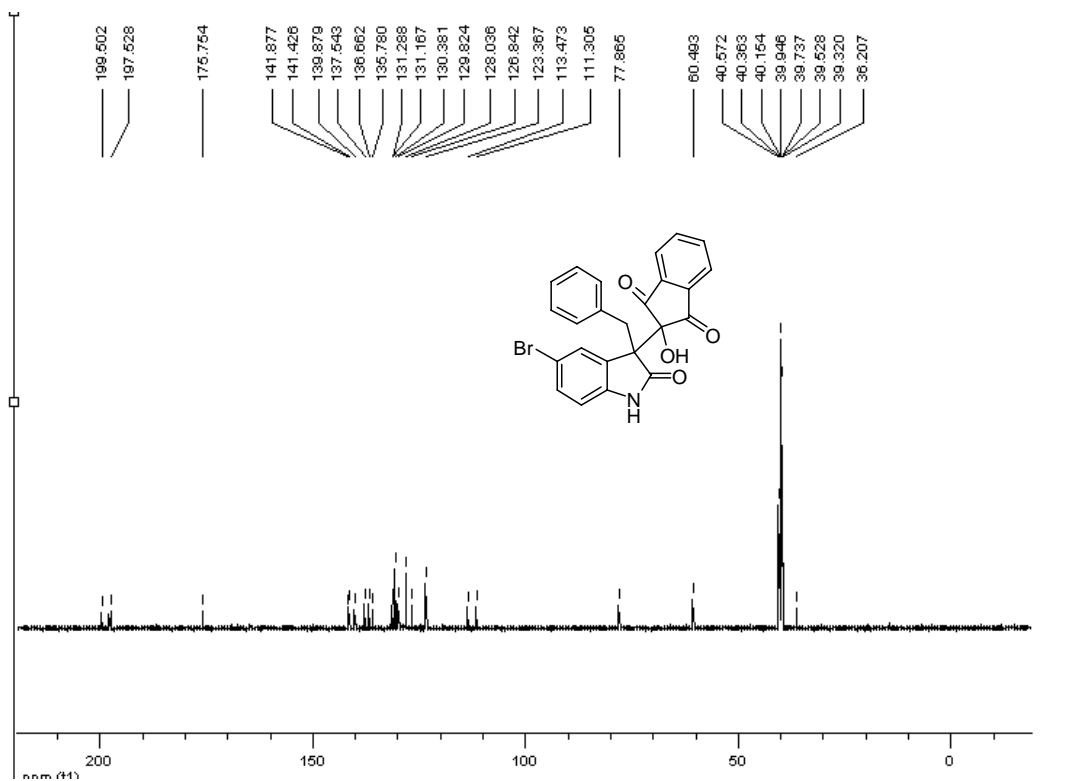



# $^1\text{H}$ and $^{13}\text{C}$ NMR of 3g'

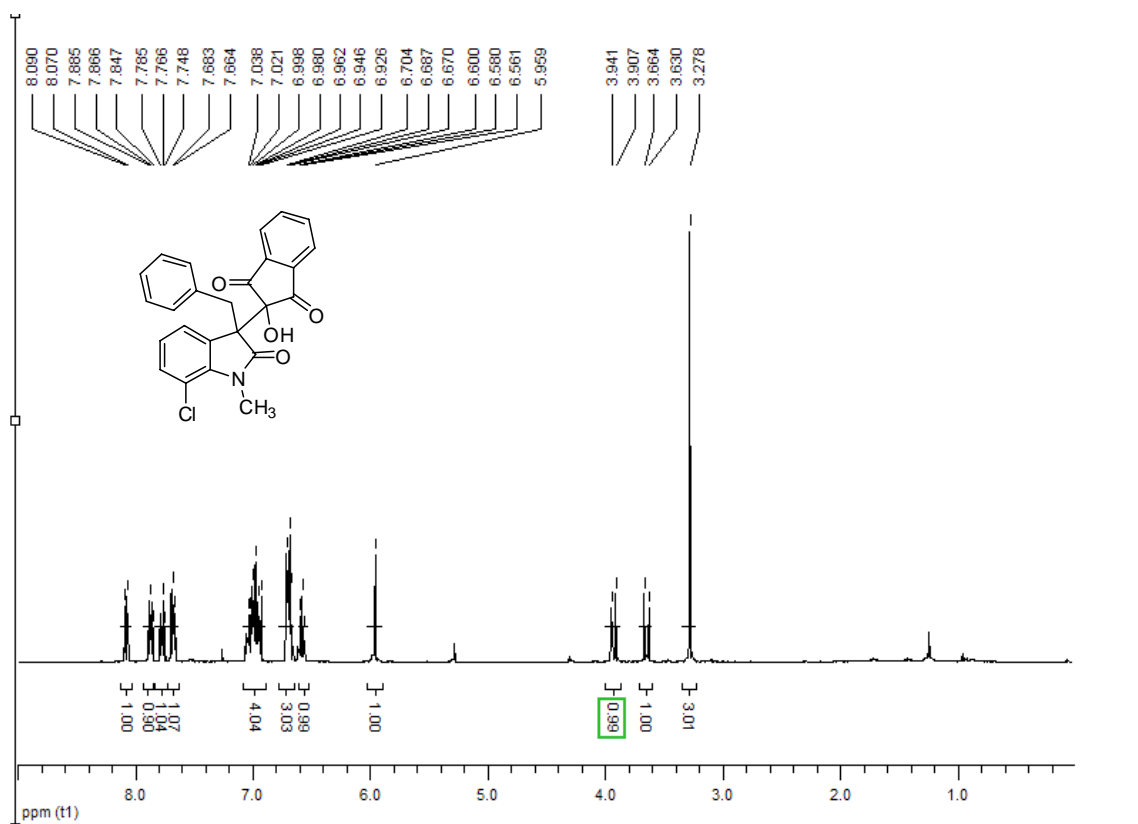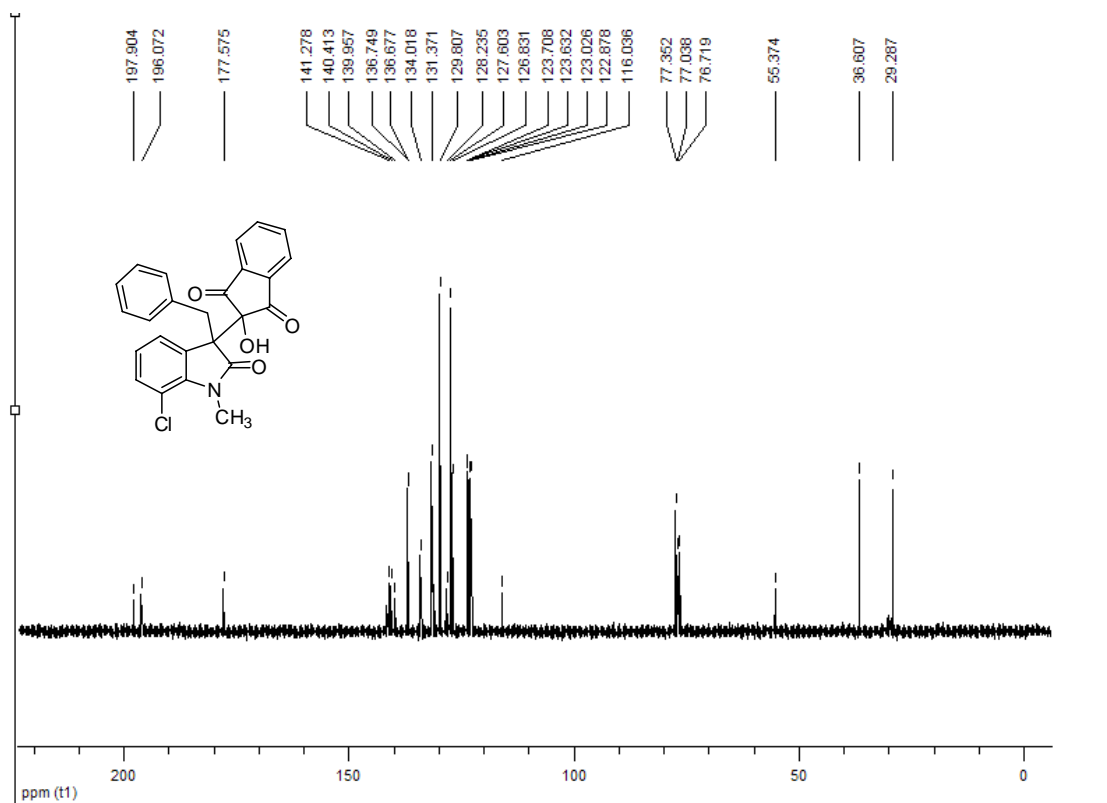

Supplement: c4ob02103g1.pdf [file c4ob02103g1.pdf]
